# Supplementary material for: Secretin-interacting plug proteins prevent antibiotic influx during type IV pilus assembly in Pseudomonas aeruginosa
Source: Research Square preprint supplement (doi:10.21203/rs.3.rs-8003949/v1), 2025-12-01
Supplement: Supplementary file 1 [file 4627affcedb07776b13bfec1.xlsx]

## Sheet: PAO1
Mutation Category	loci	Minimum	Maximum	Gene name	Base Change	Polymorphism Type	Protein Effect	Codon Change	Amino Acid Change
Mutations present only in PAO1	330930	330930	330930		T → G	SNP (transversion)
	785697	785698	785697		+T	Insertion
	3135938	3135938	3135938	hypothetical protein CDS (PA2777)	C → T	SNP (transition)	None	GCG → GCA
	3874254	3874254	3874254		A → C	SNP (transversion)
	5376917	5376917	5376917	hypothetical protein CDS (PA4788)	A → C	SNP (transversion)	None	GCA → GCC
Mutations present in both PAO1 and PAO1tw+	169284	169284	169284		-G	Deletion
	411130	411130	411130		CCCCC → CCCC	Deletion (tandem repeat)
	413850	413850	413850		T → C	SNP (transition)
	667029	667030	667029		+C	Insertion
	740419	740420	740419	type II secretion system protein CDS (hxcY, PA0683)	+C	Insertion	Frame Shift
	816532	816533	816532		CCC → CCCC	Insertion (tandem repeat)
	891100	891101	891100		+C	Insertion
	1116213	1116214	1116213		+C	Insertion
	1215659	1215660	1215659		GG → GGG	Insertion (tandem repeat)
	1275768	1275768	1275768	napA CDS	-A	Deletion	Frame Shift
	1440625	1440625	1440625	protease CDS	AAA → AA	Deletion (tandem repeat)	Frame Shift
	1445357	1445358	1445357		+G	Insertion
	1467483	1467483	1467483		C → GCG	Insertion
	1589438	1589438	1589438	chemotaxis-specific methylesterase CDS	G → C	SNP (transversion)	Substitution	GGC → GCC	Gly → Ala
	1835045	1835046	1835045	masA CDS	+C	Insertion	Frame Shift
	2169350	2169351	2169350		GG → GGG	Insertion (tandem repeat)
	2186927	2186928	2186927		+C	Insertion
	2195462	2195463	2195462		CCCCC → CCCCCC	Insertion (tandem repeat)
	2239547	2239547	2239547		T → G	SNP (transversion)
	2239555	2239556	2239555		+G	Insertion
	2355771	2355772	2355771		+G	Insertion
	2356684	2356684	2356684	hypothetical protein CDS (PA2141)	CCC → CC	Deletion (tandem repeat)	Frame Shift
	2532046	2532047	2532046		+C	Insertion
	2669175	2669175	2669175	pvdJ CDS	G → C	SNP (transversion)	Substitution	CCG → GCG	Pro → Ala
	2753522	2753523	2753522		+C	Insertion
	3016845	3016846	3016845		+C	Insertion
	3083196	3083197	3083196		+G	Insertion
	3874135	3874135	3874135		T → C	SNP (transition)
	3919508	3919509	3919508		+C	Insertion
	4212201	4212201	4212201	N-acetyl-D-glucosamine phosphotransferase systemtransporter CDS	A → G	SNP (transition)	Substitution	CAC → CGC	His → Arg
	4344266	4344266	4344266	narK1 CDS	A → G	SNP (transition)	None	CTT → CTC
	4448856	4448855	4448856		CG → GC	Substitution
	4539469	4539470	4539469		+C	Insertion
	4789053	4789054	4789053		+A	Insertion
	4789121	4789122	4789121		+C	Insertion
	4888194	4888195	4888194		+G	Insertion
	4924553	4924552	4924553	hypothetical protein CDS (PA4394)	CG → GC	Substitution	Substitution	CCC,GTG → CCG,CTG	ProVal → ProLeu
	5033101	5033102	5033101		+C	Insertion
	5472416	5472417	5472416		+G	Insertion
	5655230	5655231	5655230	hypothetical protein CDS (PA5024)	CGGCGGCGG → CGGCGGCGGCGG	Insertion (tandem repeat)	Insertion	→ GGC	+ Gly
	5743462	5743461	5743462	hutU CDS	CG → GC	Substitution	Substitution	ACG → AGC	Thr → Ser
	6098781	6098781	6098781	soxA CDS	G → C	SNP (transversion)	None	GGG → GGC
	6115455	6115455	6115455	mtr CDS	T → G	SNP (transversion)	Substitution	AAA → AAC	Lys → Asn
