# Supplementary material for: Secretin-interacting plug proteins prevent antibiotic influx during type IV pilus assembly in Pseudomonas aeruginosa
Source: Research Square preprint supplement (doi:10.21203/rs.3.rs-8003949/v1), 2025-12-01
Supplement: Supplementary file 2 [file 4ef95d599248d111ffffcb95.xlsx]

## Sheet: PAO1tw+
Mutation Category	loci	Minimum	Maximum	Gene name	Base Change	Polymorphism Type	Protein Effect	Codon Change	Amino Acid Change
Mutations present only in PAO1tw+	183697	183697	183697	transcriptional regulator CDS (PA0159)	T → G	SNP (transversion)	Substitution	TGT → TGG	Cys → Trp
	721622	721622	721622		C → T	SNP (transition)
	2342111	2342112	2342111		+T	Insertion
	2738626	2738627	2738626	hypothetical protein CDS (PA2440)	CCCCCC → CCCCCCC	Insertion (tandem repeat)	Frame Shift
	2807715	2807708	2807715	mexT CDS	-GCCGGCCA	Deletion	Frame Shift
	2807982	2807982	2807982	mexT CDS	T → A	SNP (transversion)	Substitution	TTC → ATC	Phe → Ile
	2808193	2808193	2808193	mexT CDS	T → A	SNP (transversion)	Substitution	GTG → GAG	Val → E
	4869855	4869855	4869855	transcriptional regulator CDS (PA4341)	T → G	SNP (transversion)	Substitution	GAA → GAC	Glu → Asp
	5036891	5036891	5036891		A → C	SNP (transversion)
	5071553	5071550	5071553	(pilC CDS)	-TGAC	Deletion	(Frameshift)
	5242140	5242140	5242140		T → C	SNP (transition)
	5242141	5242141	5242141		G → T	SNP (transversion)
	5242146	5242145	5242146		TG → GC	Substitution
	5242147	5242147	5242147		G → C	SNP (transversion)
	5242150	5242149	5242150		CG → GT	Substitution
	5242153	5242152	5242153		CA → GT	Substitution
	5242164	5242163	5242164		CC → GT	Substitution
	6079222	6079222	6079222	dgcB CDS	A → G	SNP (transition)	None	CTA → CTG
Mutations present in both PAO1 and PAO1tw+	169284	169284	169284		-G	Deletion
	411130	411130	411130		CCCCC → CCCC	Deletion (tandem repeat)
	413850	413850	413850		T → C	SNP (transition)
	667030	667030	667030		+C	Insertion
	740419	740420	740419	type II secretion system protein CDS (hxcY, PA0683)	+C	Insertion	Frame Shift
	816532	816533	816532		CCC → CCCC	Insertion (tandem repeat)
	891100	891101	891100		+C	Insertion
	1116213	1116214	1116213		+C	Insertion
	1215659	1215660	1215659		GG → GGG	Insertion (tandem repeat)
	1275768	1275768	1275768	napA CDS	-A	Deletion	Frame Shift
	1440625	1440625	1440625	protease CDS (PA1327)	AAA → AA	Deletion (tandem repeat)	Frame Shift
	1445357	1445358	1445357		+G	Insertion
	1467483	1467483	1467483		C → GCG	Insertion
	1589438	1589438	1589438	chemotaxis-specific methylesterase CDS (PA1459)	G → C	SNP (transversion)	Substitution	GGC → GCC	Gly → Ala
	1835045	1835046	1835045	masA CDS	+C	Insertion	Frame Shift
	2169350	2169351	2169350		GG → GGG	Insertion (tandem repeat)
	2186927	2186928	2186927		+C	Insertion
	2195462	2195463	2195462		CCCCC → CCCCCC	Insertion (tandem repeat)
	2239547	2239547	2239547		T → G	SNP (transversion)
	2239555	2239556	2239555		+G	Insertion
	2355771	2355772	2355771		+G	Insertion
	2356684	2356684	2356684	hypothetical protein CDS (PA2141)	CCC → (C)2	Deletion (tandem repeat)	Frame Shift
	2532046	2532047	2532046		+C	Insertion
	2669175	2669175	2669175	pvdJ CDS	G → C	SNP (transversion)	Substitution	CCG → GCG	Pro → Ala
	2753522	2753523	2753522		+C	Insertion
	3016845	3016846	3016845		+C	Insertion
	3083196	3083197	3083196		+G	Insertion
	3874135	3874135	3874135		T → C	SNP (transition)
	3919508	3919509	3919508		+C	Insertion
	4212201	4212201	4212201	N-acetyl-D-glucosamine phosphotransferase systemtransporter CDS (PA3760)	A → G	SNP (transition)	Substitution	CAC → CGC	His → Arg
	4344266	4344266	4344266	narK1 CDS	A → G	SNP (transition)	None	CTT → CTC
	4448856	4448855	4448856		CG → GC	Substitution
	4539469	4539470	4539469		+C	Insertion
	4789053	4789054	4789053		+A	Insertion
	4789121	4789122	4789121		+C	Insertion
	4888194	4888195	4888194		+G	Insertion
	4924553	4924552	4924553	hypothetical protein CDS (PA4394)	CG → GC	Substitution	Substitution	CCC,GTG → CCG,CTG	ProVal → ProLeu
	5033101	5033102	5033101		+C	Insertion
	5472416	5472417	5472416		+G	Insertion
	5655230	5655231	5655230	hypothetical protein CDS (PA5024)	CGGCGGCGG → CGGCGGCGGCGG	Insertion (tandem repeat)	Insertion	→ GGC	→ Gly
	5743462	5743461	5743462	hutU CDS	CG → GC	Substitution	Substitution	ACG → AGC	Thr → Ser
	6098781	6098781	6098781	soxA CDS	G → C	SNP (transversion)	None	GGG → GGC
	6115455	6115455	6115455	mtr CDS	T → G	SNP (transversion)	Substitution	AAA → AAC	Lys → Asn
Pf1 phage related genes (Mutations present only in PAO1tw+)	789170	789170	789170		C → T	SNP (transition)
	789185	789185	789185		A → C	SNP (transversion)
	789220	789219	789220		GG → AT	Substitution
	789266	789266	789266		C → T	SNP (transition)
	789288	789288	789288		C → T	SNP (transition)
	789332	789332	789332		C → T	SNP (transition)
	789409	789409	789409	hypothetical protein CDS (PA0718)	C → G	SNP (transversion)	Substitution	GCC → GGC	Ala → Gly
	789439	789439	789439	hypothetical protein CDS (PA0718)	T → C	SNP (transition)	Substitution	GTC → GCC	Val → Ala
	789470	789470	789470	hypothetical protein CDS (PA0718)	A → G	SNP (transition)	None	CCA → CCG
	789473	789473	789473	hypothetical protein CDS (PA0718)	C → T	SNP (transition)	None	GAC → GAT
	789476	789476	789476	hypothetical protein CDS (PA0718)	T → C	SNP (transition)	None	TGT → TGC
	789505	789505	789505	hypothetical protein CDS (PA0718)	G → A	SNP (transition)	Substitution	GGT → GAT	Gly → Asp
	789602	789602	789602	hypothetical protein CDS (PA0718)	G → A	SNP (transition)	None	AAG → AAA
	789605	789605	789605	hypothetical protein CDS (PA0718)	C → T	SNP (transition)	None	CCC → CCT
	789614	789614	789614	hypothetical protein CDS (PA0718)	T → C	SNP (transition)	None	TTT → TTC
	789651	789651	789651		A → C	SNP (transversion)
	789659	789659	789659	hypothetical protein CDS (PA0719)	T → C	SNP (transition)	None	CTT → CTC
	789760	789760	789760	hypothetical protein CDS (PA0719)	C → T	SNP (transition)	Substitution	CCT → CTT	Pro → Leu
	789791	789791	789791	hypothetical protein CDS (PA0719)	G → C	SNP (transversion)	None	CGG → CGC
	789833	789833	789833	hypothetical protein CDS (PA0719)	G → T	SNP (transversion)	None	CTG → CTT
	789948	789948	789948	hypothetical protein CDS (PA0719)	CCCC → CCC	Deletion (tandem repeat)	Frame Shift
	789960	789960	789960	hypothetical protein CDS (PA0719)	A → C	SNP (transversion)	None	AGA → CGA
	789980	789980	789980	hypothetical protein CDS (PA0719)	T → C	SNP (transition)	None	GAT → GAC
	789985	789985	789985	hypothetical protein CDS (PA0719)	C → A	SNP (transversion)	Substitution	TCC → TAC	Ser → Tyr
	789987	789987	789987	hypothetical protein CDS (PA0719)	C → T	SNP (transition)	Substitution	CCG → TCG	Pro → Ser
	789997	789997	789997	hypothetical protein CDS (PA0719)	C → T	SNP (transition)	Substitution	CCG → CTG	Pro → Leu
	790219	790219	790219	helix destabilizing protein of bacteriophage Pf1 CDS (PA0720)	C → T	SNP (transition)	None	ACC → ACT
	790228	790228	790228	helix destabilizing protein of bacteriophage Pf1 CDS (PA0720)	T → C	SNP (transition)	None	TAT → TAC
	790267	790267	790267	helix destabilizing protein of bacteriophage Pf1 CDS (PA0720)	A → G	SNP (transition)	None	CAA → CAG
	790291	790291	790291	helix destabilizing protein of bacteriophage Pf1 CDS (PA0720)	T → C	SNP (transition)	None	GGT → GGC
	790312	790312	790312	helix destabilizing protein of bacteriophage Pf1 CDS (PA0720)	A → C	SNP (transversion)	None	GGA → GGC
	790378	790378	790378	helix destabilizing protein of bacteriophage Pf1 CDS (PA0720)	G → A	SNP (transition)	None	CCG → CCA
	790408	790408	790408	helix destabilizing protein of bacteriophage Pf1 CDS (PA0720)	T → C	SNP (transition)	None	CGT → CGC
	790429	790429	790429	helix destabilizing protein of bacteriophage Pf1 CDS (PA0720)	C → T	SNP (transition)	None	GGC → GGT
	790447	790447	790447	helix destabilizing protein of bacteriophage Pf1 CDS (PA0720)	G → A	SNP (transition)	None	CAG → CAA
	790453	790453	790453	helix destabilizing protein of bacteriophage Pf1 CDS (PA0720)	A → T	SNP (transversion)	None	CTA → CTT
	790477	790477	790477	helix destabilizing protein of bacteriophage Pf1 CDS (PA0720)	C → T	SNP (transition)	None	GGC → GGT
	790486	790485	790486	helix destabilizing protein of bacteriophage Pf1 CDS (PA0720)	TG → CC	Substitution	Substitution	ATG → ACC	Met → Thr
	790522	790521	790522	helix destabilizing protein of bacteriophage Pf1 CDS (PA0720)	TG → CA	Substitution	Substitution	GTG → GCA	Val → Ala
	790580	790580	790580	helix destabilizing protein of bacteriophage Pf1 CDS (PA0720)	A → T	SNP (transversion)	Substitution	ACC → TCC	Thr → Ser
Pf1 phage related genes (Mutations present only in PAO1tw+)	790597	790597	790597	helix destabilizing protein of bacteriophage Pf1 CDS (PA0720)	G → C	SNP (transversion)	None	GCG → GCC
	790604	790604	790604		C → G	SNP (transversion)
	790640	790640	790640	hypothetical protein CDS (PA0721)	C → T	SNP (transition)	None	TTC → TTT
	790701	790701	790701	hypothetical protein CDS (PA0721)	G → A	SNP (transition)	Substitution	GCT → ACT	Ala → Thr
	790718	790718	790718		C → T	SNP (transition)
	791138	791138	791138	coaB CDS	C → G	SNP (transversion)	None	GGC → GGG
	791198	791198	791198	coaB CDS	T → C	SNP (transition)	None	GTT → GTC
	791759	791759	791759	phage coat protein A CDS (PA0724)	T → G	SNP (transversion)	None	TCT → TCG
	791868	791868	791868	phage coat protein A CDS (PA0724)	C → T	SNP (transition)	None	CTG → TTG
	791924	791924	791924	phage coat protein A CDS (PA0724)	A → C	SNP (transversion)	None	GGA → GGC
	791927	791927	791927	phage coat protein A CDS (PA0724)	G → A	SNP (transition)	None	CAG → CAA
	791930	791929	791930	phage coat protein A CDS (PA0724)	AT → GC	Substitution	Substitution	AAT → AGC	Asn → Ser
	791942	791942	791942	phage coat protein A CDS (PA0724)	T → C	SNP (transition)	None	GAT → GAC
	792114	792114	792114	phage coat protein A CDS (PA0724)	A → G	SNP (transition)	Substitution	AGT → GGT	Ser → Gly
	792119	792119	792119	phage coat protein A CDS (PA0724)	C → T	SNP (transition)	None	GAC → GAT
	792124	792124	792124	phage coat protein A CDS (PA0724)	G → A	SNP (transition)	Substitution	GGC → GAC	Gly → Asp
	792152	792152	792152	phage coat protein A CDS (PA0724)	T → C	SNP (transition)	None	AAT → AAC
	792188	792188	792188	phage coat protein A CDS (PA0724)	C → T	SNP (transition)	None	GGC → GGT
	792192	792190	792192	phage coat protein A CDS (PA0724)	-GCG	Deletion	Deletion	GGC,GAC → GAC	GlyAsp → Asp
	792275	792275	792275	phage coat protein A CDS (PA0724)	C → T	SNP (transition)	None	AAC → AAT
	792317	792317	792317	phage coat protein A CDS (PA0724)	C → A	SNP (transversion)	None	CCC → CCA
	792326	792326	792326	phage coat protein A CDS (PA0724)	C → T	SNP (transition)	None	CCC → CCT
	792359	792359	792359	phage coat protein A CDS (PA0724)	C → T	SNP (transition)	None	ACC → ACT
	792401	792401	792401	phage coat protein A CDS (PA0724)	C → A	SNP (transversion)	Substitution	GAC → GAA	Asp → Glu
	792443	792443	792443	phage coat protein A CDS (PA0724)	T → C	SNP (transition)	None	GAT → GAC
	792455	792455	792455	phage coat protein A CDS (PA0724)	C → T	SNP (transition)	None	GGC → GGT
	792590	792590	792590	phage coat protein A CDS (PA0724)	G → A	SNP (transition)	None	CTG → CTA
	792608	792608	792608	phage coat protein A CDS (PA0724)	C → T	SNP (transition)	None	GCC → GCT
	792696	792696	792696	hypothetical protein CDS (PA0725)	C → T	SNP (transition)	None	GAC → GAT
	792834	792834	792834	hypothetical protein CDS (PA0725)	C → T	SNP (transition)	None	AGC → AGT
	792882	792882	792882	hypothetical protein CDS (PA0725)	T → G	SNP (transversion)	None	GGT → GGG
	793143	793143	793143	hypothetical protein CDS (PA0726)	T → C	SNP (transition)	None	TTT → TTC
	793242	793242	793242	hypothetical protein CDS (PA0726)	T → G	SNP (transversion)	None	GGT → GGG
	793284	793284	793284	hypothetical protein CDS (PA0726)	A → G	SNP (transition)	None	AAA → AAG
	793347	793347	793347	hypothetical protein CDS (PA0726)	G → A	SNP (transition)	None	GCG → GCA
	793389	793389	793389	hypothetical protein CDS (PA0726)	T → C	SNP (transition)	None	CAT → CAC
	793410	793410	793410	hypothetical protein CDS (PA0726)	T → C	SNP (transition)	None	ATT → ATC
	793641	793641	793641	hypothetical protein CDS (PA0726)	G → A	SNP (transition)	None	CAG → CAA
	793757	793757	793757	hypothetical protein CDS (PA0726)	C → G	SNP (transversion)	Substitution	GCT → GGT	Ala → Gly
	793837	793837	793837	hypothetical protein CDS (PA0726)	A → G	SNP (transition)	Substitution	ACG → GCG	Thr → Ala
Pf1 phage related genes (Mutations present only in PAO1tw+)	793950	793950	793950	hypothetical protein CDS (PA0726)	T → C	SNP (transition)	None	CTT → CTC
	793996	793996	793996	hypothetical protein CDS (PA0726)	C → T	SNP (transition)	None	CTG → TTG
	794001	794001	794001	hypothetical protein CDS (PA0726)	C → G	SNP (transversion)	Substitution	GAC → GAG	Asp → Glu
	794064	794064	794064	hypothetical protein CDS (PA0726)	A → G	SNP (transition)	None	GTA → GTG
	794106	794106	794106	hypothetical protein CDS (PA0726)	G → C	SNP (transversion)	Substitution	GAG → GAC	Glu → Asp
	794128	794128	794128	hypothetical protein CDS (PA0726)	A → G	SNP (transition)	Substitution	ACC → GCC	Thr → Ala
	794140	794140	794140	hypothetical protein CDS (PA0726)	C → G	SNP (transversion)	Substitution	CCC → GCC	Pro → Ala
	794162	794162	794162	hypothetical protein CDS (PA0726)	T → C	SNP (transition)	Substitution	GTT → GCT	Val → Ala
	794178	794178	794178	hypothetical protein CDS (PA0726)	T → C	SNP (transition)	None	GTT → GTC
	794184	794184	794184	hypothetical protein CDS (PA0726)	C → G	SNP (transversion)	None	GCC → GCG
	794195	794195	794195	hypothetical protein CDS (PA0726)	C → T	SNP (transition)	Substitution	GCA → GTA	Ala → Val
	794208	794208	794208	hypothetical protein CDS (PA0726)	G → T	SNP (transversion)	None	GGG → GGT
	794265	794265	794265	hypothetical protein CDS (PA0726)	G → C	SNP (transversion)	Substitution	CAG → CAC	Gln → His
	794291	794290	794291		CC → TT	Substitution
	794328	794328	794328		A → T	SNP (transversion)
	794430	794430	794430		C → T	SNP (transition)
	794612	794612	794612	hypothetical protein CDS (PA0727)	C → T	SNP (transition)	None	CTG → TTG
	794629	794629	794629	hypothetical protein CDS (PA0727)	T → C	SNP (transition)	None	ATT → ATC
	794647	794647	794647	hypothetical protein CDS (PA0727)	T → C	SNP (transition)	None	GAT → GAC
	794650	794650	794650	hypothetical protein CDS (PA0727)	G → C	SNP (transversion)	None	ACG → ACC
	794677	794674	794677	hypothetical protein CDS (PA0727)	ACTC → GTTG	Substitution	None	AAA,CTC → AAG,TTG
	794680	794680	794680	hypothetical protein CDS (PA0727)	G → C	SNP (transversion)	None	CGG → CGC
	794707	794707	794707	hypothetical protein CDS (PA0727)	C → G	SNP (transversion)	None	CTC → CTG
	794740	794740	794740	hypothetical protein CDS (PA0727)	G → A	SNP (transition)	None	GAG → GAA
	794755	794755	794755	hypothetical protein CDS (PA0727)	C → T	SNP (transition)	None	CGC → CGT
	794770	794770	794770	hypothetical protein CDS (PA0727)	C → T	SNP (transition)	None	TCC → TCT
	794797	794797	794797	hypothetical protein CDS (PA0727)	T → C	SNP (transition)	None	GCT → GCC
	794806	794806	794806	hypothetical protein CDS (PA0727)	T → C	SNP (transition)	None	GGT → GGC
	794818	794818	794818	hypothetical protein CDS (PA0727)	A → G	SNP (transition)	None	CTA → CTG
	794827	794827	794827	hypothetical protein CDS (PA0727)	T → C	SNP (transition)	None	AAT → AAC
	794875	794875	794875	hypothetical protein CDS (PA0727)	A → G	SNP (transition)	None	GTA → GTG
	794881	794881	794881	hypothetical protein CDS (PA0727)	T → C	SNP (transition)	None	CCT → CCC
	794890	794888	794890	hypothetical protein CDS (PA0727)	CTC → ATT	Substitution	Substitution	CTC → ATT	Leu → Ile
	794893	794893	794893	hypothetical protein CDS (PA0727)	T → C	SNP (transition)	None	GAT → GAC
	794908	794908	794908	hypothetical protein CDS (PA0727)	C → T	SNP (transition)	None	CGC → CGT
	794933	794932	794933	hypothetical protein CDS (PA0727)	TT → CC	Substitution	None	GAT,TTG → GAC,CTG
	794941	794941	794941	hypothetical protein CDS (PA0727)	T → A	SNP (transversion)	None	GCT → GCA
	794944	794944	794944	hypothetical protein CDS (PA0727)	C → G	SNP (transversion)	None	GCC → GCG
	794962	794962	794962	hypothetical protein CDS (PA0727)	A → G	SNP (transition)	None	GAA → GAG
Pf1 phage related genes (Mutations present only in PAO1tw+)	794974	794974	794974	hypothetical protein CDS (PA0727)	C → A	SNP (transversion)	None	GCC → GCA
	794977	794977	794977	hypothetical protein CDS (PA0727)	T → C	SNP (transition)	None	GCT → GCC
	794990	794989	794990	hypothetical protein CDS (PA0727)	CT → GC	Substitution	None	GCC,TTG → GCG,CTG
	794995	794995	794995	hypothetical protein CDS (PA0727)	C → T	SNP (transition)	None	GAC → GAT
	795010	795009	795010	hypothetical protein CDS (PA0727)	AA → CG	Substitution	Substitution	AAA → ACG	Lys → Thr
	795013	795013	795013	hypothetical protein CDS (PA0727)	G → T	SNP (transversion)	None	CCG → CCT
	795019	795016	795019	hypothetical protein CDS (PA0727)	TCGC → GGCT	Substitution	Substitution	CCT,CGC → CCG,GCT	ProArg → ProAla
	795025	795025	795025	hypothetical protein CDS (PA0727)	G → C	SNP (transversion)	None	CTG → CTC
	795028	795028	795028	hypothetical protein CDS (PA0727)	G → T	SNP (transversion)	None	GTG → GTT
	795031	795031	795031	hypothetical protein CDS (PA0727)	C → T	SNP (transition)	None	GAC → GAT
	795040	795040	795040	hypothetical protein CDS (PA0727)	T → C	SNP (transition)	None	CAT → CAC
	795043	795043	795043	hypothetical protein CDS (PA0727)	T → C	SNP (transition)	None	TGT → TGC
	795058	795058	795058	hypothetical protein CDS (PA0727)	G → A	SNP (transition)	None	GTG → GTA
	795061	795061	795061	hypothetical protein CDS (PA0727)	A → G	SNP (transition)	None	CGA → CGG
	795088	795088	795088	hypothetical protein CDS (PA0727)	A → G	SNP (transition)	None	GAA → GAG
	795136	795136	795136	hypothetical protein CDS (PA0727)	C → T	SNP (transition)	None	TTC → TTT
	795238	795238	795238	hypothetical protein CDS (PA0727)	C → T	SNP (transition)	None	AAC → AAT
	795289	795289	795289	hypothetical protein CDS (PA0727)	C → G	SNP (transversion)	None	GTC → GTG
	795296	795296	795296	hypothetical protein CDS (PA0727)	C → A	SNP (transversion)	Substitution	CTC → ATC	Leu → Ile
	795301	795301	795301	hypothetical protein CDS (PA0727)	A → G	SNP (transition)	None	GAA → GAG
	795304	795304	795304	hypothetical protein CDS (PA0727)	C → T	SNP (transition)	None	TTC → TTT
	795310	795309	795310	hypothetical protein CDS (PA0727)	TC → AT	Substitution	Substitution	TTC → TAT	Phe → Tyr
	795313	795313	795313	hypothetical protein CDS (PA0727)	T → C	SNP (transition)	None	CAT → CAC
	795349	795349	795349	hypothetical protein CDS (PA0727)	C → T	SNP (transition)	None	CGC → CGT
	795355	795355	795355	hypothetical protein CDS (PA0727)	T → C	SNP (transition)	None	GCT → GCC
	795370	795370	795370	hypothetical protein CDS (PA0727)	T → C	SNP (transition)	None	ATT → ATC
	795385	795385	795385	hypothetical protein CDS (PA0727)	T → C	SNP (transition)	None	TAT → TAC
	795391	795391	795391	hypothetical protein CDS (PA0727)	G → C	SNP (transversion)	None	GGG → GGC
	795403	795403	795403	hypothetical protein CDS (PA0727)	C → T	SNP (transition)	None	CAC → CAT
	795406	795406	795406	hypothetical protein CDS (PA0727)	G → A	SNP (transition)	None	CTG → CTA
	795409	795409	795409	hypothetical protein CDS (PA0727)	A → G	SNP (transition)	None	CAA → CAG
	795412	795412	795412	hypothetical protein CDS (PA0727)	A → G	SNP (transition)	None	GGA → GGG
	795424	795424	795424	hypothetical protein CDS (PA0727)	C → T	SNP (transition)	None	TAC → TAT
	795436	795433	795436	hypothetical protein CDS (PA0727)	AAGC → GGCA	Substitution	Substitution	GAA,AGC → GAG,GCA	GluSer → GluAla
	795443	795440	795443	hypothetical protein CDS (PA0727)	AAGC → CGTG	Substitution	Substitution	AAG,CTG → CGT,GTG	LysLeu → ArgVal
	795450	795448	795450	hypothetical protein CDS (PA0727)	GAG → CTC	Substitution	None	CTG,AGC → CTC,TCC
	795456	795455	795456	hypothetical protein CDS (PA0727)	AC → GA	Substitution	Substitution	ACG → GAG	Thr → Glu
	795463	795459	795463	hypothetical protein CDS (PA0727)	CGGTC → GCATG	Substitution	Substitution	GCG,GTC → GGC,ATG	AlaVal → GlyMet
Pf1 phage related genes (Mutations present only in PAO1tw+)	795466	795466	795466	hypothetical protein CDS (PA0727)	C → T	SNP (transition)	None	TAC → TAT
	795472	795469	795472	hypothetical protein CDS (PA0727)	TCCG → CGCC	Substitution	Substitution	GAT,CCG → GAC,GCC	AspPro → AspAla
	795667	795667	795667	hypothetical protein CDS (PA0727)	T → C	SNP (transition)	None	CGT → CGC
	795671	795671	795671	hypothetical protein CDS (PA0727)	C → T	SNP (transition)	None	CTG → TTG
	795742	795742	795742	hypothetical protein CDS (PA0727)	C → T	SNP (transition)	None	CAC → CAT
	795745	795745	795745	hypothetical protein CDS (PA0727)	A → C	SNP (transversion)	None	ATA → ATC
	795754	795754	795754	hypothetical protein CDS (PA0727)	G → C	SNP (transversion)	None	CTG → CTC
	795766	795766	795766	hypothetical protein CDS (PA0727)	G → C	SNP (transversion)	None	CGG → CGC
