# Supplementary material for: Secretin-interacting plug proteins prevent antibiotic influx during type IV pilus assembly in Pseudomonas aeruginosa
Source: Research Square preprint supplement (doi:10.21203/rs.3.rs-8003949/v1), 2025-12-01
Supplement: Supplementary file 3 [file c91396d0a5e95b611222806d.docx]

**Secretin-interacting plug proteins prevent antibiotic influx during type IV pilus assembly in *Pseudomonas aeruginosa*.**

Oh Hyun Kwon1†,Yeseul Lee2†, Bumhan Ryu3†, Joel W Sher4, Sohee Park1, Frédéric Lauber5, Bi-o Kim1, Youngki Yoo6, Seung-Hyun Cho5, Donghui Choe1, You-Hee Cho7, Jean-François Collet5, Melanie D Ohi6,8, Thomas G Bernhardt4,9, Jeong Min Chung2*, and Hongbaek Cho1*

†contributed equally

1Department of Biological Sciences, College of Natural Sciences, Sungkyunkwan University, Republic of Korea

2Department of Biotechnology, The Catholic University of Korea, Bucheon 14662, Republic of Korea

3Research Solution Center, Institute for Basic Science, Daejeon 34126, Republic of Korea

4Department of Microbiology, Blavatnik Institute, Harvard Medical School, Boston, MA, USA

5WELBIO Department, WEL Research Institute, Avenue Pasteur, 6, 1300 Wavre, Belgium; de Duve Institute, Université catholique de Louvain (UCLouvain)

6Life Sciences Institute, University of Michigan, Ann Arbor, Michigan, USA.

7Department of Pharmacy, College of Pharmacy and Institute of Pharmaceutical Sciences CHA University, Republic of Korea

8Department of Cell and Developmental Biology, University of Michigan, Ann Arbor, Michigan, USA.

9Howard Hughes Medical Institute, Harvard Medical School, Boston, MA, USA

*To whom correspondence should be addressed.

Hongbaek Cho, Ph.D.

Sungkyunkwan University

Department of Biological Sciences

Suwon 16419, Republic of Korea

e-mail: [hongbaek@skku.edu](mailto:hongbaek@skku.edu)

Jeong Min Chung, Ph.D.

The Catholic University of Korea

Department of Biotechnology

Bucheon 14662, Republic of Korea

e-mail: [jmchung@catholic.ac.kr](mailto:jmchung@catholic.ac.kr)

This Supplementary Information contains Supplementary Figures 1-3, Supplementary Tables 3-7, legends for Supplementary Videos 1-6, and detailed information on plasmid and strain construction. Supplementary Tables 1-2 and Supplementary Videos 1-6 are provided as separate files.

**
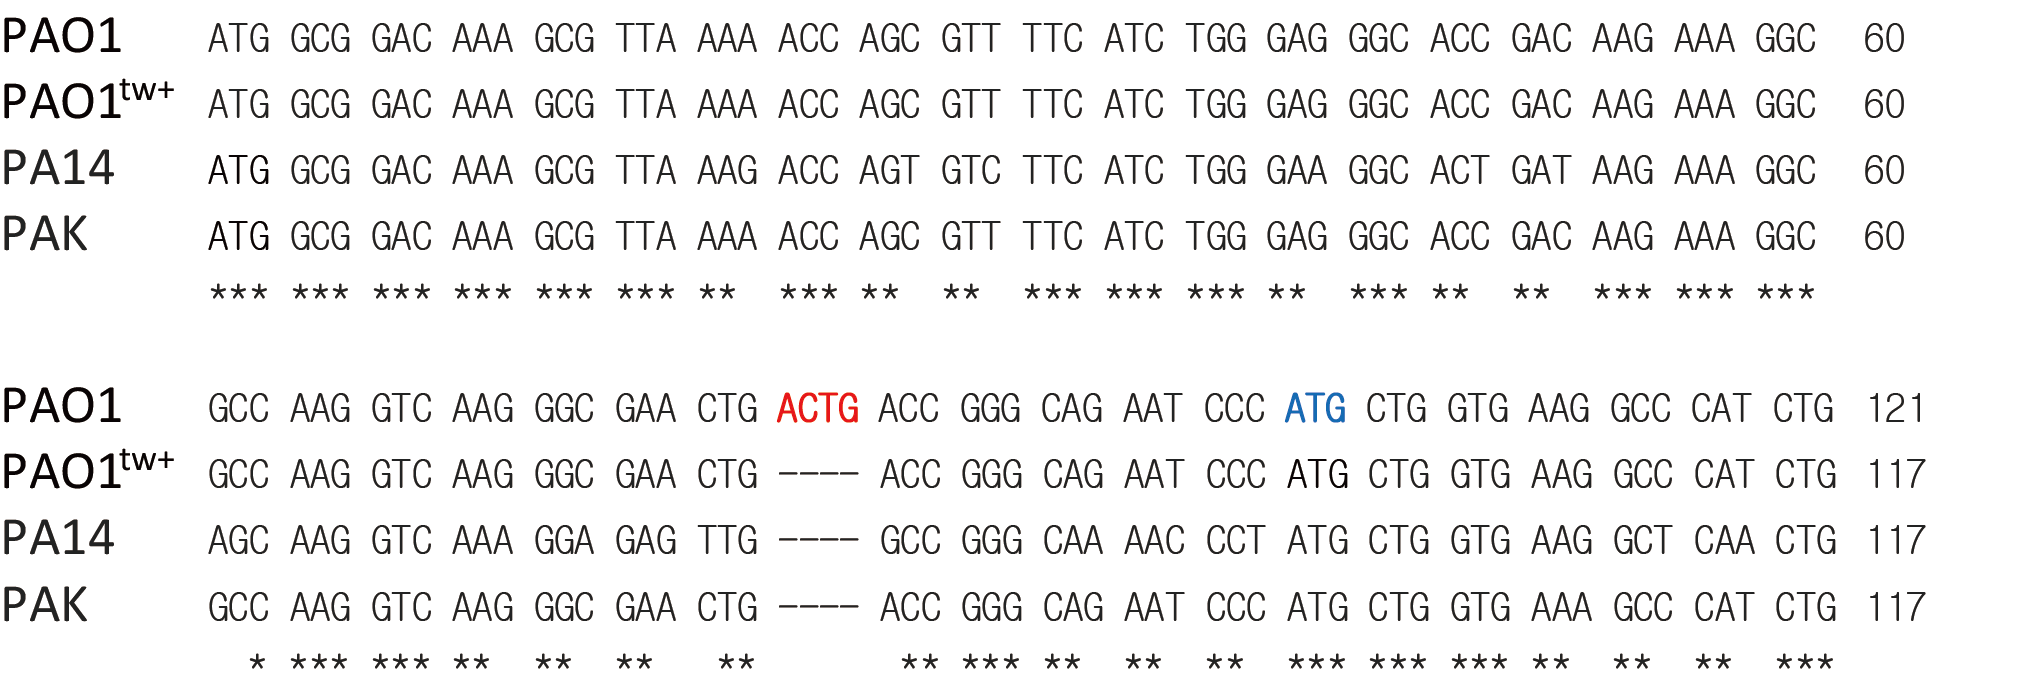
**

**Supplementary Fig. 1 | The PAO1 strain used for the Tn-Seq and initial characterization has a frameshift mutation in the coding sequence of *pilC*.** Alignment of the *pilC* coding sequences of several *P. aeruginosa* strains revealed that the PAO1 strain we initially used has a frameshift mutation in the *pilC* gene by insertion of 4 bases (indicated in red) after the 27th codon. The same frameshift mutation was present in the PAO1 reference genome (NC_002516), but was not recognized as a frameshift mutation because an internal ATG codon (indicated in blue) was misannotated as the start codon. Twitching proficient strains, PAO1tw+, PA14, and PAK, do not have this insertion. Conserved bases among the *pilC* coding sequences of different *P. aeruginosa* strains are indicated as * at the bottom. Detailed summaries of all mutation sites identified by whole-genome sequencing of PAO1 and PAO1tw+, compared with NC_002516, are provided in Supplementary Table 1 and 2, respectively.


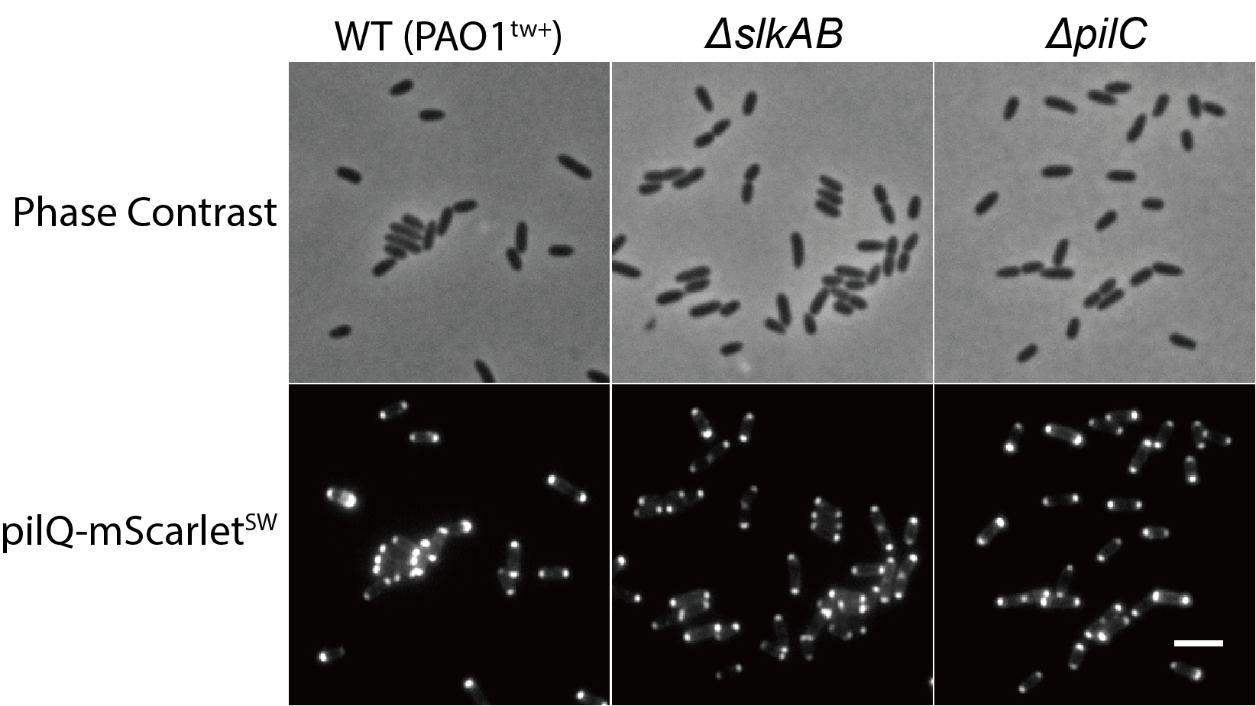


**Supplementary Fig. 2 | PilQ localizes to the poles.** PAO1tw+ and its *ΔslkAB* and *ΔpilC* mutant derivatives that express *pilQ-mScarletSW* from its native locus (OKP20, OKP21, and OKP29) were grown overnight in LB. The overnight cultures were diluted 1:100 in M9-glucose (0.2%) medium, grown at 37 °C to an exponential phase (OD600 = 0.2~0.3), and imaged on 2% agarose pads containing 1X M9 salts. Bar equals 3 μm.

**
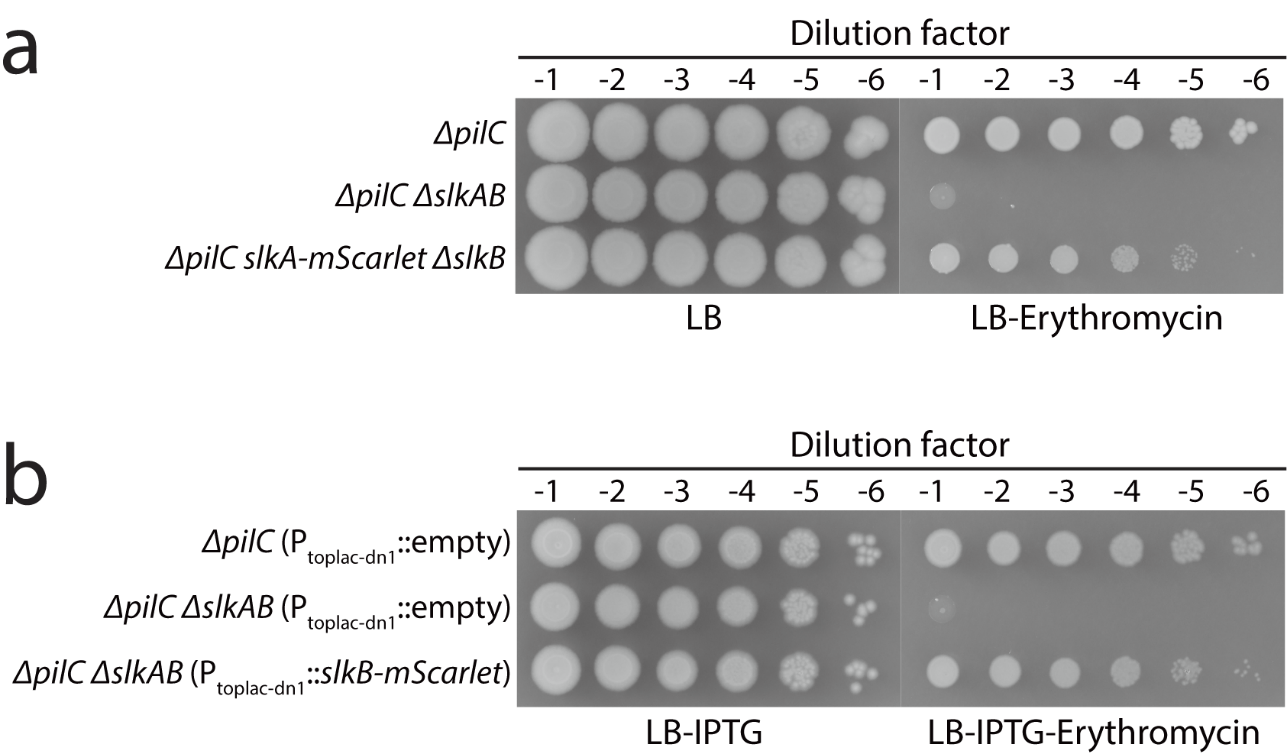
Supplementary Fig. 3 | SlkA-mScarlet and SlkB-mScarlet are partially functional.** **a**, OKP23 [PAO1tw+ Δ*pilC*], OKP24 [PAO1tw+ Δ*slkAB* Δ*pilC*], and OKP61 [PAO1tw+ Δ*pilC slkA-mScarlet* Δ*slkB*] strains were grown overnight in LB, serially diluted, and spotted on LB agar lacking or containing 50 μg/mL erythromycin. The plates were photographed after incubation for 28 hours at 37 °C to visualize suppression of the barrier defect by *slkA-mScarlet* expression. **b**, OKP23(attTn7::pKHT104, empty vector), OKP24(attTn7::pKHT104), and OKP24(attTn7::pOKP154, Ptoplac-dn1::*slkB-mScarlet*) strains were grown overnight in LB, serially diluted, and spotted on LB agar supplemented with 100 μM IPTG or 100 μM IPTG and 50 μg/mL erythromycin. The plates were photographed after incubation for 20 hours at 37 °C.

**Supplementary Table 3 | Label-free MS1 quantification of PilQ complexes.**

| **Strain** | **Protein** | **Gene ID** | **Accession** | | **MS1 Intensity** | | **Normalized Quantity** |
| --- | --- | --- | --- | --- | --- | --- | --- |
| **PilQ only** | PilQ | *PA5040* | P34750 | | 69644.13 | | 68783.20 |
| Uncharacterized protein | *PA0359* | Q9I6D5 | | 5250.80 | | 2644.87 |
| SlkA | ND | | | | | |
| SlkB | ND | | | | | |
| FimU | ND | | | | | |
| PilV | ND | | | | | |
| PilW | ND | | | | | |
| PilX | ND | | | | | |
| PilE | ND | | | | | |
| TsaP | *PA0020* | | Q9I7A7 | 3492.81 | 6042.93 | |
| PilY1 | ND | | | | | |
| **PilQ + SlkA** | PilQ | *PA5040* | | P34750 | 226491.89 | 165195.5 | |
| Uncharacterized protein | *PA0359* | | Q9I6D5 | 22368.63 | 5633.26 | |
| SlkA | *PA5122* | | Q9HU62 | 1246.35 | 405.98 | |
| SlkB | ND | | | | | |
| FimU | ND | | | | | |
| PilV | *PA4551* | | G3XD84 | 221.66 | 32.04 | |
| PilW | ND | | | | | |
| PilX | ND | | | | | |
| PilE | ND | | | | | |
| TsaP | *PA0020* | | Q9I7A7 | 590.12 | 260.51 | |
| PilY1 | *PA4554* | | Q9HVM8 | 110.60 | 102.87 | |

| **Strain** | **Protein** | **Gene ID** | **Accession** | **MS1 Intensity** | **Normalized Quantity** |
| --- | --- | --- | --- | --- | --- |
| **PilQ + SlkB** | PilQ | *PA5040* | P34750 | 14708.20 | 7586.75 |
| Uncharacterized protein | *PA0359* | Q9I6D5 | 2189.89 | 990.19 |
| SlkA | ND | | | |
| SlkB | *PA5123* | Q9HU61 | 1021.52 | 435.96 |
| FimU | ND | | | |
| PilV | ND | | | |
| PilW | ND | | | |
| PilX | ND | | | |
| PilE | ND | | | |
| TsaP | *PA0020* | Q9I7A7 | 198.02 | 37.39 |
| PilY1 | ND | | | |

Label-free MS1 profiles for affinity-purified complexes from three *P. aeruginosa* preparations—PilQ (PA5040) only, PilQ–SlkA (PA5122), and PilQ–SlkB (PA5123). Entries are listed by gene ID (PA locus) with MS1 signal intensity and normalized quantity (ND, not detected). SlkA is detected only in the PilQ–SlkA preparation and SlkB only in PilQ–SlkB. The minor pilins (FimU, PilV/W/X/E) and PilY1 are undetected in PilQ-only and PilQ–SlkB and detected at very low abundance in PilQ–SlkA, supporting assignment of the central luminal density to Slk rather than to the minor-pilin/PilY1 complex. TsaP is present at low abundance, consistent with weak or averaged-out signal in single-particle refinements (Extended Data Fig. 6). PA0359 (Q9I6D5), an OM-facing α-helical component of unknown function, co-purifies across all three preparations at variable levels. Together with the exterior OM-side ring observed in the EM reconstructions, these data are consistent with PA0359 as a candidate OM-side partner (Extended Data Fig. 9). Acquisition and normalization procedures are described in Methods.

**Supplementary Table 4 | Cryo-EM data collection, refinement, and validation statistics for C14 reconstructions**

|  | **PilQ** | **PilQ-SlkA** | **PilQ-SlkB** |
| --- | --- | --- | --- |
| **EMDB** | **EMD-66447 (C14)** | **EMD-66449 (C14)** | **EMD-66448 (C14)** |
| **PDB** | **9X0W** | **9X0Y** | **9X0X** |
| **EM data collection** | | | |
| Microscope | Titan Krios G4 | Titan Krios G4 | Titan Krios G4 |
| Detector | K3 | K3 | K3 |
| Magnification | 53000 | 53000 | 53000 |
| Voltage (kV) | 300 | 300 | 300 |
| Defocus range (μm) | -0.7 to -1.7 | -0.7 to -1.8 | -0.7 to -1.8 |
| Electron dose (e-/Å2) | 53.1 | 53.1 | 53.1 |
| Pixel size (Å) | 0.810 | 0.810 | 0.810 |
| Number of movies | 10875 | 20163 | 17172 |
| **Data processing** | | | |
| Number of extracted particles | 91252 | 1621891 | 1107022 |
| Number of particles for final map | 18241 | 63311 | 111983 |
| Symmetry imposed | *C14* | *C14* | *C14* |
| Resolution (Å) | 3.0 | 2.67 | 2.45 |
| FSC threshold | 0.143 | 0.143 | 0.143 |
| **Refinement** | | | |
| Initial model used | ModelAngelo | ModelAngelo | ModelAngelo |
| Composition (#) |  | | |
| Atoms | 41118 | 41454 | 41454 |
| Amino acids | 5348 | 5390 | 5390 |
| Ligands | 14 | 14 | 14 |
| RMSD bonds (Å) (# >4σ) | 0.007 (0) | 0.004 (0) | 0.009 (28) |
| RMSD angles (°) (# >4σ) | 0.918 (77) | 0.714 (0) | 0.793 (0) |
| B-factors (Å2) (min/max/mean) |  |  |  |
| Amino acids | 18.96/135.9/71.61 | 17.6/112.9/52.38 | 6.34/86.01/35.16 |
| Ligand | 79.31/99.61/87.00 | 40.14/58.71/51.26 | 20.0/20.0/20.0 |
| Ramachandran (%) |  |  |  |
| Favored | 96.83 | 97.88 | 96.82 |
| Allowed | 3.17 | 2.12 | 3.18 |
| Outliers | 0 | 0 | 0 |
| Rotamer outliers (%) | 0.95 | 0.04 | 0.63 |
| Clash score | 6.25 | 7.25 | 5.42 |
| C-beta outliers (%) | 0 | 0 | 0 |
| CaBLAM outliers | 0.55 | 1.08 | 1.08 |
| CC (mask) | 0.81 | 0.90 | 0.92 |
| MolProbity score | 1.54 | 1.43 | 1.49 |

**Supplementary Table 5 | Cryo-EM data collection, and processing for C1 reconstructions**

|  | **PilQ** | **PilQ-SlkA** | **PilQ-SlkB** |
| --- | --- | --- | --- |
| **EMDB** | **EMD-66444 (C1)** | **EMD-66446 (C1)** | **EMD-66445 (C1)** |
| **EM data collection** | | | |
| Microscope | Titan Krios G4 | Titan Krios G4 | Titan Krios G4 |
| Detector | K3 | K3 | K3 |
| Magnification | 53000 | 53000 | 53000 |
| Voltage (kV) | 300 | 300 | 300 |
| Defocus range (μm) | -0.7 to -1.7 | -0.7 to -1.8 | -0.7 to -1.8 |
| Electron dose (e-/Å2) | 53.1 | 53.1 | 53.1 |
| Pixel size (Å) | 0.810 | 0.810 | 0.810 |
| Number of movies | 10875 | 20163 | 17172 |
| **Data processing** | | | |
| Number of extracted particles | 91252 | 1621891 | 1107022 |
| Number of particles for final map | 18241 | 63311 | 111983 |
| Symmetry imposed | *C1* | *C1* | *C1* |
| Resolution (Å) | 4.35 | 3.06 | 2.85 |
| FSC threshold | 0.143 | 0.143 | 0.143 |

**Supplementary Table 6. Strains used in this study**

| **Strain** | **Genotype** | **Source/**  **Reference** |
| --- | --- | --- |
| PAO1 | Wild type [twitching-defective due to a frameshift mutation in *pilC*] | Dove lab, HMS |
| PAO1tw+ | Wild type | Cho lab, CHA Univ. |
| PA14 | Wild type | Cho lab, CHA Univ. |
| PAK | Wild type | Cho lab, CHA Univ. |
| DH5α(λpir) | F- *endA1 hsdR17* (*r-m+*) *supE44 thi-1 recA1 gyrA relA1* Δ(*lacZYA-argF*)*u189 Φ80lacZ*Δ*M15 λpir* | 1 |
| Sm10(λpir) | KanR *thi-1 thr leu tonA lacY supE recA::RP4-2-Tc::Mu attλ::pir* | 2 |
| PAO1/pJN105 | PAO1 / pJN105 Para::empty | This study |
| PAO1tw+  (attTn7::pKHT105) | PAO1tw+ attTn7::Ptopac-uv5::empty | This study |
| HJP1 | PAO1tw+ Δ*slkAB* | This study |
| HJP1 (attTn7::pOKP154) | PAO1tw+ Δ*slkAB*  attTn7::P­toplac-dn1:: *slkB*-*mScarlet* | This study |
| OKP5 | PAO1 Δ*slkA* | This study |
| OKP6 | PAO1 Δ*slkB* | This study |
| OKP7 | PAO1 Δ*slkAB* | This study |
| OKP7/pJN105 | PAO1 Δ*slkAB* / pJN105 Para::empty | This study |
| OKP7/pOKP17 | PAO1 Δ*slkAB* / pJN105 Para::*slkA* | This study |
| OKP7/pOKP18 | PAO1 Δ*slkAB* / pJN105 Para::*slkB* | This study |
| OKP7/pOKP139 | PAO1 Δ*slkAB* / pJN105 Para::*pilC* | This study |
| OKP12 | PAO1 Δ*pilQ* | This study |
| OKP13 | PAO1 Δ*slkAB* Δ*pilQ* | This study |
| OKP13  (attTn7::pKHT105) | PAO1 Δ*slkAB* Δ*pilQ*  attTn7::Ptoplac-uv5::empty | This study |
| OKP13  (attTn7::pOKP121) | PAO1 Δ*slkAB* Δ*pilQ*  attTn7::Ptoplac-uv5::RBSΦ10-*pilQ* | This study |
| OKP14 | PAO1tw+ Δ*pilQ* | This study |
| OKP15 | PAO1tw+ Δ*slkAB* Δ*pilQ* | This study |
| OKP15  (attTn7::pOKP121) | PAO1tw+ Δ*slkAB* Δ*pilQ*  attTn7:: Ptoplac-uv5::RBSΦ10-*pilQ* | This study |
| OKP15  (attTn7::pOKP154) | PAO1tw+ Δ*slkAB* Δ*pilQ*  attTn7::Ptoplac-dn1:: *slkB*-*mScarlet* | This study |
| OKP20 | PAO1tw+ *pilQ-mScarletSW* | This study |
| OKP21 | PAO1tw+ Δ*slkAB pilQ-mScarletSW* | This study |
| OKP23 | PAO1tw+ Δ*pilC* | This study |
| OKP23  (attTn7::pBO038) | PAO1tw+ Δ*pilC*  attTn7:: Ptoplac-uv5::RBSΦ10-*dsbAss-mScarlet* | This study |
| OKP23  (attTn7::pKHT104) | PAO1tw+ Δ*pilC*  attTn7::Ptoplac-dn1::empty | This study |
| OKP24 | PAO1tw+ Δ*slkAB* Δ*pilC* | This study |
| OKP24  (attTn7::pKHT104) | PAO1tw+ Δ*slkAB* Δ*pilC*  attTn7::Ptoplac-dn1::empty | This study |
| OKP24  (attTn7::pOKP154) | PAO1tw+ Δ*slkAB* Δ*pilC*  attTn7::Ptoplac-dn1:: *slkB*-*mScarlet* | This study |
| OKP29 | PAO1tw+ Δ*pilC pilQ-mScarletSW* | This study |
| OKP44 | PAO1tw+ Δ*pilC* Δ*pilQ* | This study |
| OKP45 | PAO1tw+ Δ*slkAB* Δ*pilA* | This study |
| OKP46 | PA14 Δ*slkAB* | This study |
| OKP47 | PAK Δ*slkAB* | This study |
| OKP48 | PAKΔ*pilC* | This study |
| OKP49 | PAO1tw+ Δ*pilMNOPQ* | This study |
| OKP49  (attTn7::pKHT105) | PAO1tw+ Δ*pilMNOPQ*  attTn7::Ptoplac-uv5::empty | This study |
| OKP49  (attTn7::pOKP121) | PAO1tw+ Δ*pilMNOPQ*  attTn7::Ptoplac-uv5::RBSΦ10-*pilQ* | This study |
| OKP50 | PAO1tw+ Δ*slkAB* Δ*pilMNOPQ* | This study |
| OKP50  (attTn7::pKHT105) | PAO1tw+ Δ*slkAB* Δ*pilMNOPQ*  attTn7::Ptoplac-uv5::empty | This study |
| OKP50  (attTn7::pOKP121) | PAO1tw+ Δ*slkAB* Δ*pilMNOPQ*  attTn7::Ptoplac-uv5::RBSΦ10-*pilQ* | This study |
| OKP51 | PAO1tw+ Δ*slkAB* Δ*pilC* Δ*pilQ* | This study |
| OKP51  (attTn7::pOKP151) | PAO1tw+ Δ*slkAB* Δ*pilC* Δ*pilQ*  attTn7:: Ptoplac-uv5::RBSΦ10-*pilQ*2XHis8 | This study |
| OKP51  (attTn7::pOKP154) | PAO1tw+Δ*slkAB* Δ*pilC* Δ*pilQ*  attTn7::Ptoplac-dn1:: *slkB*-*mScarlet* | This study |
| OKP57 | PAKΔ*slkAB* Δ*pilC* | This study |
| OKP59 | PAO1tw+ *slkA-mScarlet* Δ*slkB* | This study |
| OKP60 | PAO1tw+ Δ*pilQ slkA-mScarlet* Δ*slkB* | This study |
| OKP61 | PAO1tw+ Δ*pilC slkA-mScarlet* Δ*slkB* | This study |
| OKP62 | PAO1 Δ*oprM* | This study |
| OKP64 | PA14Δ*pilC* | This study |
| OKP65 | PA14Δ*slkAB* Δ*pilC* | This study |
| OKP68 | PAO1 Δ*slkAB* Δ*pilMNOPQ* | This study |
| OKP68  (attTn7::pKHT105) | PAO1 Δ*slkAB* Δ*pilMNOPQ*  attTn7::Ptoplac-uv5::empty | This study |
| OKP68  (attTn7::pOKP121) | PAO1 Δ*slkAB ΔpilMNOPQ*  attTn7::Ptoplac-uv5::RBSΦ10-*pilQ* | This study |
| OKP69 | PAO1tw+ Δ*slkAB* Δ*pilA* Δ*pilQ* | This study |
| OKP77 | PAO1tw+ Δ*slkAB* Δ*pilY1* | This study |
| OKP78 | PAO1tw+ Δ*slkAB* Δ*pilY1* Δ*pilQ* | This study |
| OKP80 | PA14Δ*slkAB* Δ*pilC* Δ*pilQ* | This study |
| OKP82 | PAKΔ*slkAB* Δ*pilC* Δ*pilQ* | This study |
| OKP96 | PAO1tw+Δ*pilA* | This study |
| OKP97 | PAO1tw+Δ*pilY1* | This study |
| OKP120 | PAO1tw+ Δ*pilC* Δ*pilQ* *slkA*-*mScarlet* Δ*slkB* | This study |
| OKP181 | PAO1tw+ Δ*slkAB* Δ*pilC pilQ*2XHis8 | This study |
| OKP181 (attTn7::pKHT105) | PAO1tw+ Δ*slkAB* Δ*pilC pilQ*2XHis8 attTn7::Ptoplac-uv5::empty | This study |
| OKP181 (attTn7::pOKP170) | PAO1tw+ Δ*slkAB* Δ*pilC pilQ*2XHis8  attTn7::Ptoplac-uv5::RBSΦ10-*slkA* | This study |
| OKP181 (attTn7::pOKP171) | PAO1tw+ Δ*slkAB* Δ*pilC pilQ*2XHis8  attTn7::Ptoplac-uv5::RBSΦ10-*slkB* | This study |

**Supplementary Table 7. Plasmids used in this study**

| **Plasmid** | **Genotype*** | **Origin** | **Source/**  **Reference** |
| --- | --- | --- | --- |
| pBTK30 | *aacC1 bla oriT mariner C9* | R6K | 3 |
| pEXG2 | *aacC1 sacB oriT* [facilitates allelic exchange in P.  aeruginosa] | ColE1 | 4 |
| pKHT104 | *aacC1 bla Tn7 lacIq Ptoplac-dn1* [*facilitates insertion of Ptoplac-dn1-regulated sequences into the attTn7 attachment site of P. aeruginosa*] | pUC18 | Dove lab HMS |
| pKHT105 | *aacC1 bla Tn7 lacIq Ptoplac-uv5* [*facilitates insertion of Ptoplac-uv5-regulated sequences into the attTn7 attachment site of P. aeruginosa*] | pUC18 | Dove lab HMS |
| pJN105 | *aacC1 araC Para* [replicating arabinose-inducible expression vector for *P. aeruginosa*] | pBBR1 | 5 |
| pTNS3 | *bla oriR6K tnsABCD* from P1 and Plac [Tn7 transposase expression] | R6K | 6 |
| pOKP10 | pEXG2∆*slkA*(*4-501*) | ColE1 | This study |
| pOKP11 | pEXG2∆*slkB* (*4-552*) | ColE1 | This study |
| pOKP12 | pEXG2∆*slkAB* | ColE1 | This study |
| pOKP16 | *aacC*1 *araC* Para::Empty [BamHI site in the *araI* removed in pJN105] | pBBR1 | This study |
| pOKP17 | pJN105 Para::*slkA* | pBBR1 | This study |
| pOKP18 | pJN105 Para::*slkB* | pBBR1 | This study |
| pOKP23 | pEXG2∆*pilQ* (*4-1845*) | ColE1 | This study |
| pOKP26 | pOKP16 Para::*mScarlet* | pBBR1 | This study |
| pOKP28 | pOKP16 Para::*pilQ*(*1-396*)*-mScarlet* | pBBR1 | This study |
| pOKP29 | pOKP16 Para::*pilQ*(*1-396*)*-mScarlet-pilQ*(*397-2145*) | pBBR1 | This study |
| pOKP35 | pEXG2 *pilQ*(*1-396*)*-mScarlet-pilQ*(*397-827*) | ColE1 | This study |
| pOKP42 | pEXG2∆*pilC* (*4-1039*) | ColE1 | This study |
| pOKP57 | pOKP16 Para::*slkA-mScarlet* | pBBR1 | This study |
| pOKP82 | pEXG2∆*pilA* (*50-368*) | ColE1 | This study |
| pOKP88 | pEXG2∆*pilMNOPQ* | ColE1 | This study |
| pOKP92 | pEXG2 PA14 ∆*slkAB* (∆*PA14_RS27590-PA14_RS27595*) | ColE1 | This study |
| pOKP93 | pEXG2PAK ∆*slkAB* (∆*Y880_RS24175-Y880_RS24180*) | ColE1 | This study |
| pOKP94 | pEXG2 PA14 ∆*pilC* (*4*-*1102*) (∆*PA14_RS23960*) | ColE1 | This study |
| pOKP95 | pEXG2 PAK ∆*pilC* (*4-1119*) (∆*Y880_RS20950*) | ColE1 | This study |
| pOKP101 | pEXG2 *slkA-mScarlet-*∆*slkB*(*1-57*) | ColE1 | This study |
| pOKP103 | pEXG2∆*oprM* (*4-1135*) | ColE1 | This study |
| pOKP115 | pEXG2∆*pilY1* (*4-3173*) | ColE1 | This study |
| pOKP116 | pEXG2PA14 ∆*pilQ* (*4*-*1831*) (∆*PA14_RS27185*) | ColE1 | This study |
| pOKP117 | pEXG2PAK ∆*pilQ* (*4-1845*) (∆*Y880_RS23755*) | ColE1 | This study |
| pOKP121 | pKHT105 RBSΦ10-*pilQ* | pUC18 | This study |
| pOKP139 | pJN105 *Para::pilC* | pBBR1 | This study |
| pOKP151 | pKHT105 RBSΦ10-*pilQ*2xHis8 | pUC18 | This study |
| pOKP154 | pKHT104 *slkB-mScarlet* | pUC18 | This study |
| pOKP170 | pKHT105 RBSΦ10-*slkA* | pUC18 | This study |
| pOKP171 | pKHT105 RBSΦ10-*slkB* | pUC18 | This study |
| pOKP284 | pEXG2 *pilQ-His8 (C-terminus)* | ColE1 | This study |
| pOKP285 | pEXG2 *pilQ-His8 (AMIN)* | ColE1 | This study |
| pBO037 | pKHT104 *dsbAss-mScarlet* | pUC18 | This study |

* Numbers in pEXG2 derivatives indicate the nucleotide positions of each open reading frame.

**Supplementary Videos 1-6.** 3D variability analysis (3DVA) was run in C1 on the same particle stack used for the reconstructions, using a lumen/gate-restricted soft mask; no symmetry was imposed on the plug. Trajectories visualize the principal variability modes. Motions are confined to the luminal density (“plug”), with minimal deformation of the PilQ barrel. Views are oriented as follows: top = down the channel axis from the OM side; bottom = up from the periplasm; side = orthogonal to the axis.

**Supplementary Video 1. SlkA, top view (OM-down).**

**Supplementary Video 2. SlkA, side view.**

**Supplementary Video 3. SlkA, bottom view (periplasm-up).**

**Supplementary Video 4. SlkB, top view (OM-down).**

**Supplementary Video 5. SlkB, side view.**

**Supplementary Video 6. SlkB, bottom view (periplasm-up).**

**Plasmid construction**

pBO037 – To make a vector for expression of periplasmic C-terminal mScarlet fusion proteins, an 838 bp g-block DNA fragment containing φ10 RBS-NcoI site-the signal sequence of PAO1 *dsbA*-BamHI site-PstI site-5 amino acid linker-mScarlet coding sequence between BglII and KpnI sites was synthesized from IDT. The g-Block DNA was digested with BglII and KpnI and ligated with pKHT104 digested with BamHI and KpnI, which make the BamHI site between dsbA signal sequence and mScarlet unique for later use.

pOKP10 – To construct a plasmid for deletion of *slkA* (*PA5122*), a 700bp region upstream of *slkA* was amplified using 5’-GCTAAAGCTTCTGGGAAAGCGCTCCTCGAG-3’ and 5’-TTTCTTCCCGAGGTGCATGGACGGTCTCCGGGTGA-3’. A 701 bp region downstream of *slkA* was amplified using 5’-CGGAGACCGTCCATGCACCTCGGGAAGAAACGATG-3’ and 5’-GCTATCTAGAGGTAATCGCACCAATCTGGTG-3’. The resulting PCR products were spliced using overlap extension PCR (OE) using the primers 5’-GCTAAAGCTTCTGGGAAAGCGCTCCTCGAG-3’ and 5’-GCTATCTAGAGGTAATCGCACCAATCTGGTG-3’. The OE product was digested with HindIII and XbaI and ligated with pEXG2 digested with the same enzymes to generate pOKP10.

pOKP11 – To construct a plasmid for deletion of *slkB* (*PA5123*), a 702bp region upstream of *slkB* was amplified using 5’-GCTAAAGCTTCTGGCGCAACGAGGGTTC-3’ and 5’-CTCGCTTGGCTCTATCATCGTTTCTTCCCGAGGTG-3’. A 700 bp region downstream of *slkB* was amplified using 5’-CGGGAAGAAACGATGATAGAGCCAAGCGAGCGCTA-3’ and 5’-GCTATCTAGAGCACCAGCAGCTTGGTGGTC-3’. The PCR products were spliced by OE using the primers 5’-GCTAAAGCTTCTGGCGCAACGAGGGTTC-3’ and 5’-GCTATCTAGAGCACCAGCAGCTTGGTGGTC-3’. The OE product was cloned between HindIII and XbaI sites of pEXG2 as described above to generate pOKP11.

pOKP12 – To construct a plasmid for deletion of *slkAB* (*PA5122-PA5123*), a 700bp region upstream of *slkA* was amplified using 5’-GCTAAAGCTTCTGGGAAAGCGCTCCTCGAG-3’ and 5’- CTCGCTTGGCTCTATCATGGACGGTCTCCGGGTG-3’. A 700 bp region downstream of *slkB* was amplified using 5’-CGGAGACCGTCCATGATAGAGCCAAGCGAGCGCTAG-3’ and 5’-GCTATCTAGAGCACCAGCAGCTTGGTGGTC-3’. The PCR products were spliced by OE using the primers 5’- GCTAAAGCTTCTGGGAAAGCGCTCCTCGAG-3’ and 5’-GCTATCTAGAGCACCAGCAGCTTGGTGGTC-3’. The OE product was cloned between HindIII and XbaI sites of pEXG2 as described above to generate pOKP12.

pOKP17-pOKP18 – To clone *slkA* under arabinose promoter, *slkA* gene with native RBS was amplified using a primer pairs 5’-GTCAGAATTCGGTTCACCCGGAGACCGTCC-3’ and 5’-GTCATCTAGATCATCGTTTCTTCCCGAGGTGC-3’. For *slkB* cloning, *slkB* with native RBS was amplified with 5’-GTCAGAATTCGGTTCACCCGGAGACCGTCCATGATCCCGCGCATTCTCG-3’ and 5’-GTCATCTAGACTAGCGCTCGCTTGGCTC-3’. Each PCR product was digested with EcoRI and XbaI and ligated with pJN105 digested with the same enzymes to generate pOKP17 (*slkA*) and pOKP18 (*slkB*).

pOKP23 – To construct a plasmid for a *pilQ* deletion, a 620 bp DNA upstream of *pilQ* was amplified using 5’-GCTAAGCTTGGCCAAGACCTATCGCTAC-3’ and 5’-CACCTTGACTTCGACCATCGTCCGACTCCGTTGTA-3’. A 620 bp region including a 300 bp *pilQ* sequence and a 320 bp region downstream of pilQ was amplified using 5’-CGGAGTCGGACGATGGTCGAAGTCAAGGTGACCAA-3’ and 5’-GCTATCTAGACGAGGCATGCAGGTACAC-3’. PCR products were spliced by OE using the primers 5’-GCTAAGCTTGGCCAAGACCTATCGCTAC-3’ and 5’-GCTATCTAGACGAGGCATGCAGGTACAC-3’. The OE product was cloned into pEXG2 using HindIII and XbaI sites to generate pOKP12.

pOKP26 – To clone GS linker-*mScarlet* under arabinose promoter, *mScarlet* gene with a GS linker was amplified with a primer pair 5’-GTCA*GGATCC*GGTAGCGTTTCTAAAGGTGAAGCAGTTATC-3’ and 5’-GTCA*TCTAGA*TTACTTATACAGTTCATCCATACCTC-3’ using pBO037 as a template. The resulting PCR product was digested with BamHI and XbaI and ligated with pOKP16 digested with the same enzymes to generate pOKP26.

pOKP28-pOKP29 – A PilQ-mScarlet sandwich fusion was constructed as described in Carter et al (2017) with mScarlet located between the first and second AMIM domains of PilQ. The 416 bp region including 20 bp upstream of *pilQ* and 396 bp *pilQ* coding sequence was amplified using a primer pair 5’-GTCA*GAATTC*CTGTACAACGGAGTCGGACG-3’ and 5’-TTCACCTTTAGAAACGCTACCGACGCTGGCGCCGGCC-3’. *mScarlet* sequence was amplified with 5’-GCCAGCGTCGGTAGCGTTTCTAAAGGTGAAGCAGTTATC-3’ and 5’-GTCA*GGATCC*CTTATACAGTTCATCCATACC-3’ using pBO037 as a template. The PCR products were spliced by OE with a primer pair 5’-GTCA*GAATTC*CTGTACAACGGAGTCGGACG-3’ and 5’-GTCA*GGATCC*CTTATACAGTTCATCCATACC-3’. The overlap extension product was cloned into pOKP16 using EcoRI and BamHI sites to generate pOKP28 that express a truncated *pilQ-mScarlet* fusion gene.

The 1,749 bp coding sequence of *pilQ* at the 3’ end was amplified with a primer pair 5’-GTCA*GGATCC*GCTTCCGCCGCTCCGGTC-3’ and 5’-GTCA*TCTAGA*TCAGCGACCGATTGCGATGG-3’. The PCR product was digested with BamHI and XbaI and ligated with pOKP28 digested with the same enzymes to generate pOKP29 that expresses *pilQ-mScarlet* sandwich fusion under arabinose promoter.

pOKP35 – To construct a plasmid for generating *pilQ-mScarlet* sandwich fusion at the native *pilQ* locus, a 1552 bp region of *pilQ*-*mScarlet* sandwich fusion was amplified with a primer pair 5’-GCT*AAGCTT*CTGTACAACGGAGTCGGACG-3’ and 5’-GCTA*TCTAGA*TTGTCCTTCTTGCGCCGCTC-3’ using pOKP29 as the template. The PCR product was cloned into pEXG2 using HindIII and XbaI sites to generate pOKP35.

pOKP42 – To construct a plasmid for a *pilC* deletion, a 707 bp sequence upstream of *pilC* from the *pilC* start codon was amplified using 5’-GCTA*TCTAGA*TATCGCTATACACCGGCCTG -3’ and 5’-ATCGAGCGAACCGGACATGGATTAATCCTTGGTCAC-3’. A downstream 717 bp region, including 186 bp *pilC* coding sequence at the 3’ end was amplified using 5’-AAGGATTAATCCATGTCCGGTTCGCTCGATGAGATG -3’ and 5’- GCTA*GGATCC*GAAGAGGCCGAAATGGTTGG-3’. The PCR products were spliced by OE using the primers 5’- GCTA*TCTAGA*TATCGCTATACACCGGCCTG -3’ and 5’-GCTA*GGATCC*GAAGAGGCCGAAATGGTTGG -3’. The OE product was cloned into pEXG2 using BamHI and XbaI.

pOKP82 – To construct a plasmid for a *pilA* deletion, a 689 bp region upstream of *pilA* including the 49 bp *pilA* sequence at the 5’ end was amplified using a primer pair 5’-GCTA*AAGCTT*CAAGCTTGTCGTCTTCGACC-3’ and 5’-GCAGTACGGTTCAGACAACCACGATCATCAGTTCG-3’. A 647 bp region downstream of *pilA* including 82 bp *pilA* coding sequence at the 3’ endwas amplified with a primer pair 5’-TGATGATCGTGGTTGTCTGAACCGTACTGCGGATG-3’ and 5’-GCTA*TCTAGA*CCTCTACGATGCCTTCCTG-3’. The PCR products were spliced by OE using a primer pair 5’-GCTA*AAGCTT*CAAGCTTGTCGTCTTCGACC-3’ and 5’-GCTA*TCTAGA*CCTCTACGATGCCTTCCTG-3’. The resulting OE product was cloned into pEXG2 using BamHI and XbaI.

pOKP88 – To construct a plasmid for deletion of *pilMNOPQ* operon, a 620 bp upstream region from *pilM* start codon was amplified using a primer pair 5’-GCTAAAGCTTCTTTCGCGAGAAGCTTCTTTC-3’ and 5’-ACCTTGACTTCGACCACGACCAATTCCCTATTAGC-3’. A 620 bp downstream region including 300 bp *pilQ* coding sequence at the 3’ end was amplified using 5’-AGGGAATTGGTCGTGGTCGAAGTCAAGGTGACCAA-3’ and 5’-GCTATCTAGACGAGGCATGCAGGTACAC-3’. PCR products were spliced by OE using a primer pair 5’-GCTAAAGCTTCTTTCGCGAGAAGCTTCTTTC -3’ and 5’-GCTATCTAGACGAGGCATGCAGGTACAC-3’. The resulting OE product was clone into pEXG2 using BamHI and XbaI.

pOKP92 – To construct a plasmid for a *slkAB* (*PA14_RS27590-PA14_RS27595*) deletion in PA14, a 700 bp upstream region from the start codon of *PA14_RS27590* (*slkA*) was amplified using 5’-GCTAAAGCTTCTGGGAAAGCGCTCCTCGAG-3’ and 5’-GCTAGCGCTCGCTCATGGACGGTCTCCGGGTG-3’. A 691 bp downstream region including 12 bp *PA14_RS27595* (*slkB*)coding sequence at the 3’ end was amplified using 5’-GGAGACCGTCCATGAGCGAGCGCTAGCCGAAC-3’ and 5’-GCTATCTAGAGCACCAGCAGCTTGGTGGTC-3’. The PCR products were spliced by a primer pair 5’-GCTAAAGCTTCTGGGAAAGCGCTCCTCGAG-3’ and 5’-GCTATCTAGAGCACCAGCAGCTTGGTGGTC-3’. The resulting OE product was clone into pEXG2 using BamHI and XbaI.

pOKP93 – To construct a plasmid for a *slkAB* (*Y880_RS24175-Y880_RS24180*) deletion in PAK, a 699 bp upstream region from the start codon of *Y880_RS24175* (*slkA*) was amplified using 5’-GCTAAAGCTTTTGGAAAGCGCTCCTCGAG-3’ and 5’-CTCGCTTGGCTCTATCATGGACGGTCTCCGGGTG-3’. A 700 bp downstream region including 21 bp *Y880_RS24180* (*slkB*) coding sequence at the 3’ end was amplified using 5’-CGGAGACCGTCCATGATAGAGCCAAGCGAGCGCTAG-3’ and 5’-GCTATCTAGAGCACCAGCAGCTTGGTGGTC-3’. The PCR products were spliced by OE using a primer pair 5’-GCTAAAGCTTTTGGAAAGCGCTCCTCGAG-3’ and 5’-GCTATCTAGAGCACCAGCAGCTTGGTGGTC-3’. The resulting OE product was clone into pEXG2 using BamHI and XbaI.

pOKP94 – To construct a plasmid for a *pilC* deletion in PA14, a 234 bp region upstream of *PA14_ RS23960* (*pilC*)was amplified using 5’-GCTA*AAGCTT*GTGGGCTGCGACCATTGC-3’ and 5’-TTGTCAGGTTGTCGACATGGATTAGTCCTTGGTCAC-3’. A 306 bp downstream region, including 116 bp *PA14_ RS23960* (*pilC*)sequence was amplified using 5’-AAGGACTAATCCATGTCGACAACCTGACAACGTTG-3’ and 5’-GCTA*TCTAGA*TAGGTCGCCTGCTTGGGTTC-3’. PCR products were spliced by OE using a primer pair 5’-GCTA*AAGCTT*GTGGGCTGCGACCATTGC-3’ and 5’-GCTA*TCTAGA*TAGGTCGCCTGCTTGGGTTC-3’. The OE product was cloned into pEXG2 using HindIII and XbaI sites to generate pOKP94.

pOKP95 – To construct a plasmid for a *pilC* deletion in PAK, a 615 bp region upstream of *Y880_ RS20950* (*pilC*)was amplified using 5’-GCTA*AAGCTT*AACCAGGTCAACGTCAATCC-3’ and 5’-ATCGGTTCCATGAGCATGGATTAATCCTTGGTCACG-3’. A 633 bp downstream region including a 102 bp *Y880_ RS20950* sequence at the 3’ end was amplified using 5’-AGGATTAATCCATGCTCATGGAACCGATGATCATG-3’ and 5’-GCTA*GGATCC*GAAGAGGCCGAAATGGTTGG-3’. The PCR products were spliced by OE using the primers 5’-GCTA*AAGCTT*AACCAGGTCAACGTCAATCC-3’ and 5’-GCTA*GGATCC*GAAGAGGCCGAAATGGTTGG-3’. The resulting OE product was cloned into pEXG2 using HindIII and BamHI sites to generate pOKP93.

pOKP101 – To construct a plasmid for generating *slkA-mScarlet* with a *slkB* deletion at the native *slkAB* locus, a 1262 bp *slkA*-*mScarlet* sequence was amplified with a primer pair 5’-GCTA*AAGCTT*GTGCAACGCTTGGCAGGTTC-3’ and 5’-TAGGTGTAGACCCCTTACTTATACAGTTCATCCATACCTC-3’ using pOKP57 a template. A 516 bp region of 5’ end-truncated *slkB* was amplified using 5’-GAACTGTATAAGTAAGGGGTCTACACCTACATCG-3’ and 5’-GCTA*TCTAGA*CTAGCGCTCGCTTGGCTC-3’. PCR products were spliced by overlap extension PCR using the primers 5’-GCTA*AAGCTT*GTGCAACGCTTGGCAGGTTC-3’ and 5’-GCTA*TCTAGA*CTAGCGCTCGCTTGGCTC-3’. The overlap extension product was cloned into pEXG2 using HindIII and XbaI sites to generate pOKP101.

pOKP103 – To construct a plasmid for an *oprM* deletion, a 700 bp region upstream of *oprM* was amplified using 5’-GCTA*AAGCTT*GAGCGCTACAATGGCGTG-3’ and 5’-GGAACGCCGTCTGGACATATCATTGCCCCTTTTCG-3’. A 628 bp downstream region including a 323 bp *oprM* sequence at the 3’ end was amplified using 5’-AGGGGCAATGATATGTCCAGACGGCGTTCCAGG-3’ and 5’-GCTA*TCTAGA*CAGGGTCGCGAGAATGC-3’. The PCR products were spliced by OE using the primers 5’-GCTA*AAGCTT*GAGCGCTACAATGGCGTG-3’ and 5’-GCTA*TCTAGA*CAGGGTCGCGAGAATGC-3’. The OE product was cloned into pEXG2 using HindIII and XbaI sites to generate pOKP103.

pOKP115 – To construct a plasmid for a *pilY1* deletion, a 514 bp region upstream of *pilY1* was amplified using 5’-GCTA*AAGCTT*GCATGCGCGAAGTGGTAC-3’ and 5’-CAGGGGTCATCGTTCCATGCGAGGCTCGATCAG-3’. A 509 bp downstream region including a 313 bp *pilY1* sequence at the 3’ end was amplified using 5’-ATCGAGCCTCGCATGGAACGATGACCCCTGTGC-3’ and 5’-GCTA*TCTAGA*CTTGACCTGGAACAGGCTG-3’. The PCR products were spliced by OE using a primer pair 5’-GCTA*AAGCTT*GCATGCGCGAAGTGGTAC-3’ and 5’-GCTA*TCTAGA*CTTGACCTGGAACAGGCTG-3’. The OE product was cloned into pEXG2 using HindIII and XbaI sites to generate pOKP115.

pOKP116 – To construct a plasmid for a *pilQ* deletion in PA14, a 234 bp region upstream of *PA14_ RS27185* (*pilQ*)was amplified using 5’-GCT*AAGCTT*TTACTTATAGCGCTTCGAACC-3’ and 5’-CCTTCACCTCAACGACATCGTCCGACTCCGTTGTA-3’. A 622 bp downstream region including a 302 bp *PA14_ RS27185* sequence at the 3’ end was amplified using 5’-CGGAGTCGGACGATGTCGTTGAGGTGAAGGTGACC-3’ and 5’-GCTA*TCTAGA*CGAGGCATGCAGGTACAC-3’. The PCR products were spliced by OE using a primer pair 5’-GCT*AAGCTT*TTACTTATAGCGCTTCGAACC-3’ and 5’-GCTA*TCTAGA*TAGGTCGCCTGCTTGGGTTC-3’. The resulting OE product was cloned into pEXG2 using HindIII and XbaI sites to generate pOKP116.

pOKP117 – To construct a plasmid for a *pilQ* deletion in PAK, a 620 bp region upstream of *Y880_ RS23755* (*pilQ*)was amplified using 5’-GCT*AAGCTT*GGCCAAGACCTATCGCTAC-3’ and 5’-CACCTTGACTTCGACCATCGTCCGACTCCGTTGTA-3’. A 620 bp downstream region, including a 300 bp *Y880_ RS23755* sequence at the 3’ end was amplified using 5’-CGGAGTCGGACGATGGTCGAAGTCAAGGTGACCAA-3’ and 5’-GCTA*TCTAGA*CGAGGCATGCAGGTACAC-3’. The PCR products were spliced by OE using a primer pair 5’-GCT*AAGCTT*GGCCAAGACCTATCGCTAC-3’ and 5’-GCTA*TCTAGA*CGAGGCATGCAGGTACAC-3’. The resulting OE product was cloned into pEXG2 using HindIII and BamHI sites to generate pOKP117.

pOKP121 – For constructing a plasmid that express *pilQ* under an IPTG-inducible promoter, *pilQ* was cloned in pKHT105 using a SLIC (sequence and ligation independent cloning) method7 because *pilQ* has a KpnI site in the coding sequence. Briefly, *pilQ* with a Φ10 RBS was amplified using a primer pair 5’-GCTTAGTCGACAGCTAGCC*GGATCC*TTTAAGAAGGAGATATACATATGAACAGTGGCCTCTCG-3’ and 5’-TTATGCTA*AAGCTT*GCATGCGGTACCTCAGCGACCGATTGCGATG-3’. The PCR product was mixed with pKHT105 digested with KpnI and BamHI, and processed with T4 DNA polymerase (NEB) for 2 min at RT, and transformed into *E.coli* competent cells to generate pOKP121.

pOKP139 – To clone *pilC* under arabinose promoter, PAO1tw+ *pilC* with native RBS was amplified using a primer pair 5’-GCTA*CTGCAG*CGTGACCAAGGATTAATCC-3’ and 5’-GCTA*TCTAGA*AGTTATCCGACGACGTTGC-3’. The PCR product was digested with EcoRI and XbaI and ligated with pJN105 digested with the same enzymes to generate pOKP139.

pOKP151 – To construct a plasmid that expresses dual tagged *pilQ*2XHis8 under a strong IPTG-inducible promoter (*Ptoplac-uv5*), *pilQ*2XHis8 was cloned in pKHT105 using a SLIC method. Briefly, a 462 bp region with a Φ10 RBS *pilQ* and an 8xHis purification tag after 127 proline was amplified using a primer pair 5’-GCTTAGTCGACAGCTAGCC*GGATCC*TTTAAGAAGGAGATATACATATGAACAGTGGCCTCTCG-3’ and 5’-GCTTCCATGATGATGATGATGATGATGATGGCTACCCGGCGAATTGCCGACCAC-3’. A 1855 bp region with the remaining *pilQ* and a second internal 8xHis purification tag was amplified using a primer pair 5’-GGTAGCCATCATCATCATCATCATCATCATGGAAGCGCCGGCGCCAGCGTC-3’ and 5’-AGGGGTTATGCTAAAGCTT*GCATGC*TTAGTGGTGGTGGTGGTGGTGGTGGTGGGATCCGCGACCGATTGCGATGG-3’. The PCR products were spliced by OE using a primer pair 5’- GCTTAGTCGACAGCTAGCC*GGATCC*TTTAAGAAGGAGATATACATATGAACAGTGGCCTCTCG -3’ and 5’-AGGGGTTATGCTAAAGCTT*GCATGC*TTAGTGGTGGTGGTGGTGGTGGTGGTGGGATCCGCGACCGATTGCGATGG -3’. The OE product was mixed with pKHT105 digested with BamHI and SphI, and processed with T4 DNA polymerase (NEB) for 2 min at RT, and transformed into *E.coli* competent cells to generate pOKP151.

pOKP154 – To construct a plasmid that expresses *slkB*-*mScarlet* under a weak IPTG-inducible promoter (*Ptoplac-dn1*), *slkB* was amplified using a primer pair 5’-GCTA*CCATG****G*CT**ATCCCGCGCATTCTC-3’ and 5’-GCTA*CTGCAG*GCGCTCGCTTGGCTC-3’. The PCR product was digested with NcoI and PstI and ligated with pBO037 digested with the same enzymes to generate pOKP154.

pOKP170 – For constructing a plasmid that express *slkA* under an IPTG-inducible promoter, *slkA* was cloned in pKHT5. Briefly, *slkA* with a Φ10 RBS was amplified using a primer pair 5’-GCTA*GGATCC*TTTAAGAAGGAGATATACATATGCGCCTGATCACCAGC-3’ and 5’-GCTA*GGTACC*TCATCGTTTCTTCCCGAGG-3’. The resulting PCR product was cloned into pKHT105 using BamHI and KpnI sites to generate pOKP170.

pOKP171 – For constructing a plasmid that express *slkB* under an IPTG-inducible promoter, *slkB* was cloned in pKHT5. Briefly, *slkB* with a Φ10 RBS was amplified using a primer pair 5’-GCTA*GGATCC*TTTAAGAAGGAGATATACATATGATCCCGCGCATTCTCG-3’ and 5’-GCTA*GGTACC*CTAGCGCTCGCTTGGCTC-3’. The resulting PCR product was cloned into pKHT105 using BamHI and KpnI sites to generate pOKP171.

pOKP284 – To construct a plasmid for tagging His8 to the C-terminus of *pilQ*, a 575 bp region of *pilQ* was amplified using 5’-GCTA*AAGCTT*CCGACAACATCATCCTCGAC-3’ and 5’-CGTTGTTCGATATCAGTGGTGGTGGTGGTGGTGGTGGTGGGATCCGCGACCGATTGCGATGG-3’. A 698 bp downstream region was amplified using 5’-CGCAATCGGTCGCGGATCCCACCACCACCACCACCACCACCACTGATATCGAACAACGTGGTC-3’ and 5’-GCTA*TCTAGA*CCAGCAGGTTTTCACCGATG-3’. The PCR products were spliced by OE using a primer pair 5’-GCTA*AAGCTT*CCGACAACATCATCCTCGAC-3’ and 5’-GCTA*TCTAGA*CCAGCAGGTTTTCACCGATG-3’. The resulting OE product was cloned into pEXG2 using HindIII and BamHI sites to generate pOKP284.

pOKP285 – To construct a plasmid for tagging His8 between the AMIN domain of *pilQ*, a 608 bp region of *pilQ* was amplified using 5’-GCTA*AAGCTT*TGGAAGGCTTCAACATCGAG-3’ and 5’-TGATCAACCGTGTGCGATCCTTCGCCTCGACC-3’. A 595 bp downstream region was amplified using 5’-TCGAGGCGAAGGATCGCACACGGTTGATCATCAAC-3’ and 5’-GCTA*TCTAGA*TTGTCCTTCTTGCGCCGCTC-3’ from pOKP151. The PCR products were spliced by OE using a primer pair 5’-GCTA*AAGCTT*TGGAAGGCTTCAACATCGAG-3’ and 5’-GCTA*TCTAGA*TTGTCCTTCTTGCGCCGCTC-3’. The resulting OE product was cloned into pEXG2 using HindIII and BamHI sites to generate pOKP285.

***P. aeruginosa* strain construction**

OKP5 [*∆slkA*], OKP6 [*∆slkB*], OKP7 [*∆slkAB*], and OKP12 [*∆pilQ*] – To delete *slkA*, *slkB*, *slkAB*, or *pilQ* in PAO1, plasmids pOKP10, pOKP11, pOKP12, or pOKP23 was transferred to PAO1 (the twitching-defective strain) using Sm10(λpir). Candidates for the deletion strains were obtained by selection with gentamicin and counter-selection with sucrose as described above. Colonies with the desired gene deletion were screened with primer pairs 5’-TTCGGATGCTGCGGCAACTC-3’ and 5’- CAAACCAGGCGCCGAAAAGG-3’ for *∆slkA*, 5’-GATGATCGGCACGAGAAAGG-3’ and 5’-CTTCTTCGATGATGACGTTG-3’ for *∆slkB,* 5’-TTCGGATGCTGCGGCAACTC-3’ and 5’-CTTCTTCGATGATGACGTTG-3’ for *∆slkAB,* 5’-ACGACTTGGCGACCTTCGTC-3’ and 5’-ATTTCGCGGTAGAGCGGGTC-3’ for *∆pilQ.*

OKP13 – To generate OKP13 [*∆pilQ ∆slkAB*], *pilQ* was deleted in OKP7 [*∆slkAB*] by basically using the same procedure for gene deletion except that 10 μg/mL gentamicin was used for selection of transconjugants. As OKP7 is much more susceptible to aminoglycosides than the wild type *P. aeruginosa* strains due to its defective OM barrier function, a lower concentration of gentamicin was used to avoid selection of strains with random mutations that suppress the barrier defect.

OKP13(attTn7::pKHT105) and OKP13(attTn7::pOKP121) – pOKP121 that express *pilQ* from an IPTG-inducible *toplac-uv5* promoter and its empty vector plasmid were integrated into OKP13 by using the procedure described above.

HJP1– *slkAB* was deleted in PAO1tw+ by following the same procedure described above after transferring pOKP11.

OKP14 and OKP15– *pilQ* was deleted in PAO1tw+ and HJP1 by following the same procedure described above after transferring pOKP23 to generate OKP14 [PAO1tw+ Δ*pilQ*] and OKP15 [PAO1tw+ Δ*slkAB* Δ*pilQ*]

OKP15(attTn7::pOKP121) – pOKP121 that express *pilQ* from an IPTG-inducible *toplac-uv5* promoter was integrated into OKP15 [PAO1tw+ Δ*slkAB* Δ*pilQ*] by using the procedure described above.

OKP20 and OKP21 – Strains that express *pilQ-mScarlet* sandwich fusion at the native *pilQ* locus in the PAO1tw+ and HJP1 strain backgrounds were generated by using the procedure described above after transferring pOKP35 by conjugation.

OKP23 – *pilC* was deleted in PAO1tw+ by using the procedure described above with pOKP42.

OKP24 – To generate OKP24 [∆*pilC* ∆*slkAB*], *pilC* was deleted in HJP1 [∆*slkAB*] by basically using the same procedure used to produce OKP23 except that 10 μg/mL gentamicin was used for selection of transconjugants to avoid enrichment of random mutations that suppress the barrier defect.

OKP23(attTn7::pKHT104) and OKP24(attTn7:: pKHT104) – To integrate *Ptoplac-dn1*-regulated empty vector into the Tn7 attachment site, pKHT104 was co-electroporated with pTNS3 into OKP23 and OKP24. A lower concentration of gentamicin (10 μg/mL) was used for selection to avoid enrichment of random mutations that suppress the barrier defect.

OKP29– *pilQ-mScarlet* sandwich fusion at the native *pilQ* locus was introduced in OKP23 [Δ*pilC*) using pOKP35 to generate OKP29 [PAO1tw+ Δ*pilC pilQ-mScarletSW*].

OKP44– To generate a Δ*pilC* Δ*pilQ* double mutant in the PAO1tw+ strain background, *pilC* was deleted in OKP14 [Δ*pilQ*] by using pOKP42.

OKP45 and OKP96– *pilA* was deleted in HJP1 and PAO1tw+ by using pOKP82 to generate OKP45 [PAO1tw+ Δ*slkAB* Δ*pilA*] and OKP96 [PAO1tw+Δ*pilA*].

OKP46 – *slkAB* was deleted in PA14 by using pOKP92 to generate a PA14 Δ*slkAB* strain.

OKP47 – *slkAB* was deleted in PAK by using pOKP93 to generate a PAK Δ*slkAB* strain.

OKP64– *pilC* was deleted in PA14 by using pOKP94 to generate a PA14 Δ*pilC* strain.

OKP48– *pilC* was deleted in PAK by using pOKP95 to generate a PAK Δ*pilC* strain.

OKP49 and OKP50 – *pilMNOPQ* was deleted in PAO1tw+ and HJP1 using pOKP88 to generate OKP49 [PAO1tw+ Δ*pilMNOPQ*] and OKP50 [PAO1tw+ Δ*slkAB* Δ*pilMNOPQ*], respectively.

PAO1tw+(attTn7::pKHT105), OKP49(attTn7::pKHT105), OKP49(attTn7::pOKP121), OKP50(attTn7::pKHT105), OKP50(attTn7::pOKP121) – *Ptoplac-uv5*-regulated *pilQ* plasmid pOKP121 or its empty vector plasmid pKHT105 were integrated into the Tn7 attachment site by co-electroporation with pTNS3. Candidates with the integrated plasmids were obtained by selection with 10 μg/mL gentamicin to avoid enrichment of random mutations that suppress the barrier defect.

OKP51– *pilQ* was deleted in PAO1tw+ ∆*slkAB* ∆*pilC* strain by using pOKP23 to generate OKP24 [PAO1tw+ Δ*slkAB* Δ*pilC* Δ*pilQ*]. A lower concentration of gentamicin (10 μg/mL) was used for selection of transconjugants to avoid enrichment of random mutations that suppress the barrier defect.

OKP51(attTn7::pOKP151)– To integrate a plasmid expressing *pilQ2XHis8* from *Ptoplac-uv5* pOKP151 into the Tn7 attachment site, pOKP151 was co-electroporated with pTNS3 into OKP51. Candidates for the integrated strains were obtained by selection with 10 μg/mL gentamicin to avoid enrichment of random mutations that suppress the barrier defect.

HJP1(attTn7::pOKP154), OKP15(attTn7::pOKP154), OKP24(attTn7::pOKP154), OKP51(attTn7::pOKP154)– To integrate a plasmid expressing *slkB-mScarlet* from *Ptoplac-dn1* pOKP154 into the Tn7 attachment site, pOKP154 was co-electroporated with pTNS3 into HJP1, OKP15, OKP24, OKP51. Candidates for the integrated strains were obtained by selection with 10 μg/mL gentamicin to avoid enrichment of random mutations that suppress the barrier defect.

OKP59, OKP60, OKP61, and OKP120– *slkA-mScarlet* with a *slkB* deletion was introduced at the *slkAB* locus of PAO1tw+, OKP14 [PAO1tw+ Δ*pilQ*], OKP23 [PAO1tw+ Δ*pilC*], and OKP44 [PAO1tw+ Δ*pilC* Δ*pilQ*) strains by using pOKP101.

OKP62– *oprM* was deletedin PAO1 by usingpOKP103.

OKP65– *pilC* was deleted in OKP46 [PA14 ∆*slkAB*]by using pOKP94. Candidates for the deletion strain were obtained by selection with 10 μg/mL gentamicin to avoid enrichment of random mutations that suppress the barrier defect.

OKP68– *pilMNOPQ* was deleted in HJP1 [PAO1 ∆*slkAB*] usingpOKP88.

OKP69– *pilQ* was deleted in OKP45 [PAO1tw+ Δ*slkAB* Δ*pilA*] by usingpOKP23. Candidates for the deletion strain were obtained by selection with 10 μg/mL gentamicin to avoid enrichment of random mutations that suppress the barrier defect.

OKP68(attTn7::pKHT105) and OKP68(attTn7::pOKP121) – A plasmid expressing *pilQ* from *Ptoplac-uv5* pOKP121 and its empty vector plasmid pKHT105 were integrated at the Tn7 attachment site of OKP68 by co-electroporation with pTNS3. Candidates for the integrated strains were obtained by selection with 10 μg/mL gentamicin to avoid enrichment of random mutations that suppress the barrier defect.

OKP80– *pilQ* was deleted in OKP65 [PA14 *∆slkAB ∆pilC*]by usingpOKP116. Candidates for the deletion strains were obtained by selection with 10 μg/mL gentamicin to avoid enrichment of random mutations that suppress the barrier defect.

OKP82– *pilQ* was deleted in OKP57 [PAK *∆slkAB ∆pilC*]by usingpOKP57. Candidates for the deletion strains were obtained by selection with 10 μg/mL gentamicin to avoid enrichment of random mutations that suppress the barrier defect.

OKP77, OKP78, and OKP97– *pilY1* was deletedin PAO1tw+, HJP1 [PAO1tw+ Δ*slkAB*], and OKP15 [PAO1tw+ Δ*slkAB* Δ*pilQ*] by using pOKP115. Candidates for the deletion strains were obtained by selection with 10 μg/mL gentamicin to avoid enrichment of random mutations that suppress the barrier defect.

OKP181 – *pilQ* was tagged with two His8 tags in PAO1tw+ ∆*slkAB* ∆*pilC* strain by using pOKP284 and pOKP285 sequentially to generate OKP181 [PAO1tw+ ∆*slkAB* ∆*pilC* *pilQ2XHis8*]. A lower concentration of gentamicin (10 μg/mL) was used for selection of transconjugants to avoid enrichment of random mutations that suppress the barrier defect.

OKP181(attTn7::pKHT105), OKP181(attTn7::pOKP170), OKP181(attTn7::pOKP171)–*Ptoplac-uv5*-regulated *slkA* plasmid pOKP170 or *Ptoplac-uv5*-regulated *slkB* plasmid pOKP171 or its empty vector plasmid pKHT105 were integrated into the Tn7 attachment site by co-electroporation with pTNS3. Candidates with the integrated plasmids were obtained by selection with 10 μg/mL gentamicin to avoid enrichment of random mutations that suppress the barrier defect.

**References**

1. Pal, D., Venkova-Canova, T., Srivastava, P. & Chattoraj, D. K. Multipartite Regulation of rctB, the Replication Initiator Gene of Vibrio cholerae Chromosome II. *J Bacteriol* **187**, 7167–7175 (2005).

2. Lorenzo, V. de & Timmis, K. N. Analysis and construction of stable phenotypes in gram-negative bacteria with Tn5- and Tn10-derived minitransposons. *Methods Enzymol* **235**, 386–405 (1994).

3. Goodman, A. L. *et al.* A Signaling Network Reciprocally Regulates Genes Associated with Acute Infection and Chronic Persistence in Pseudomonas aeruginosa. *Dev Cell* **7**, 745–754 (2004).

4. Rietsch, A., Vallet-Gely, I., Dove, S. L. & Mekalanos, J. J. ExsE, a secreted regulator of type III secretion genes in Pseudomonas aeruginosa. *Proc National Acad Sci* **102**, 8006–8011 (2005).

5. Newman, J. R. & Fuqua, C. Broad-host-range expression vectors that carry the l-arabinose-inducible Escherichia coli araBAD promoter and the araC regulator. *Gene* **227**, 197–203 (1999).

6. Choi, K.-H. *et al.* Genetic tools for select-agent-compliant manipulation of *Burkholderia pseudomallei*. *Appl Environ Microb* **74**, 1064–1075 (2007).

7. Jeong, J.-Y. *et al.* One-step sequence and ligation-independent cloning as a rapid and versatile cloning method for functional genomics studies. *Appl Environ Microb* **78**, 5440–5443 (2012).
